# Supplementary material for: One-pot synthesis of 2-substituted benzo[b]furans via Pd–tetraphosphine catalyzed coupling of 2-halophenols with alkynes
Source: Royal Society of Chemistry journal article supplement (doi:10.1039/c4cc00815d), 2014-01-01

## **One-pot Synthesis of 2-Substituted Benzo[*b*]furan via Pd/Tetrphosphine**

### **Catalyzed Coupling of 2-Halophenols and Alkynes**

Rong Zhou,<sup>a</sup> Wei Wang,<sup>a</sup> Zhi-jie Jiang,<sup>a</sup> Kun Wang,<sup>a</sup> Xue-li Zheng,<sup>a</sup> Hai-yan Fu,<sup>a</sup> Hua Chen<sup>a</sup> and Rui-xiang Li<sup>a\*</sup>

<sup>a</sup> Key lab of Green Chemistry and Technology, Ministry of Education; Sichuan University, Chengdu, China.

Fax: 86-28-85412904; E-mail: [liruixiang@scu.edu.cn](mailto:liruixiang@scu.edu.cn)

### **Supporting Information**

#### **Table of Contents**

**General Remarks:**

**General Procedure for the Synthesis of 2-Substituted Benzo[*b*]furan**

**Characterization Data**

**References**

**NMR spectra of compounds**

**General Remarks:** All chemicals were purchased from commercial suppliers. Except for some liquid reagents being sensitive to light and moisture (DMA, DMF, toluene, 1,4-dioxane, *o*-xylene, methanol and alcohol) was redistilled prior to use, there is no further treatment. <sup>1</sup>H NMR and <sup>13</sup>C NMR spectra were recorded on a Bruker AV II-400 MHz. Mass Spectra were measured with Waters Q-TOF Premier mass spectrometer (USA). All products were isolated by short chromatography on a silica gel (300-400 mesh) using petroleum ether (60-90 °C), unless otherwise noted. **L** was prepared according to our previous work. Compounds described in the literature were characterized by <sup>1</sup>H NMR and <sup>13</sup>C NMR spectroscopy and compared to the reported data.

**General Procedure for the Synthesis of 2-Substituted Benzo[*b*]furan:** Cs<sub>2</sub>CO<sub>3</sub> (325 mg, 1 mmol), 2-halophenol (0.5 mmol), terminal alkynes (0.6 mmol) and degassed DMF (2 mL) were added successively into a dried Schlenk tube with a magnetic bar under nitrogen. Then DMF (0.05 mL) solution of tetraphosphine **L** (0.0005 mmol) and [Pd(η<sup>3</sup>-C<sub>3</sub>H<sub>5</sub>)Cl]<sub>2</sub> (0.00025 mmol) was added into the mixture. The reaction was performed at 130 °C. At the end of reaction, the solution was cooled to room temperature and water (3 mL) was added into it. The mixture solution was extracted with ethyl acetate (3×3 mL). The organic layer was dried over MgSO<sub>4</sub>, filtered and purified with silica gel chromatography (petroleum ether) to give a corresponding product.

Table 1 Optimization of the reaction conditions for the synthesis of 2-bromophenol and phenylacetylene<sup>a</sup>

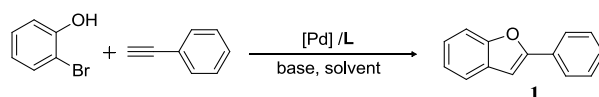

| Entry | Pd source                                                           | Base                            | Solvent          | Yield (%)       |
|-------|---------------------------------------------------------------------|---------------------------------|------------------|-----------------|
| 1     | [Pd(η <sup>3</sup> -C <sub>3</sub> H <sub>5</sub> )Cl] <sub>2</sub> | Cs <sub>2</sub> CO <sub>3</sub> | DMF              | >99             |
| 2     | Pd(OAc) <sub>2</sub>                                                | Cs <sub>2</sub> CO <sub>3</sub> | DMF              | 62              |
| 3     | (PhCN) <sub>2</sub> PdCl <sub>2</sub>                               | Cs <sub>2</sub> CO <sub>3</sub> | DMF              | 58              |
| 4     | Pd <sub>2</sub> (dba) <sub>3</sub>                                  | Cs <sub>2</sub> CO <sub>3</sub> | DMF              | 70              |
| 5     | Pd(COD)Cl <sub>2</sub>                                              | Cs <sub>2</sub> CO <sub>3</sub> | DMF              | 68              |
| 6     | PdCl <sub>2</sub>                                                   | Cs <sub>2</sub> CO <sub>3</sub> | DMF              | 71              |
| 7     | [Pd(η <sup>3</sup> -C <sub>3</sub> H <sub>5</sub> )Cl] <sub>2</sub> | Na <sub>2</sub> CO <sub>3</sub> | DMF              | 55              |
| 8     | [Pd(η <sup>3</sup> -C <sub>3</sub> H <sub>5</sub> )Cl] <sub>2</sub> | K <sub>2</sub> CO <sub>3</sub>  | DMF              | 48              |
| 9     | [Pd(η <sup>3</sup> -C <sub>3</sub> H <sub>5</sub> )Cl] <sub>2</sub> | K <sub>3</sub> PO <sub>4</sub>  | DMF              | 57              |
| 10    | [Pd(η <sup>3</sup> -C <sub>3</sub> H <sub>5</sub> )Cl] <sub>2</sub> | KOH                             | DMF              | 41              |
| 11    | [Pd(η <sup>3</sup> -C <sub>3</sub> H <sub>5</sub> )Cl] <sub>2</sub> | KOtBu                           | DMF              | 28              |
| 12    | [Pd(η <sup>3</sup> -C <sub>3</sub> H <sub>5</sub> )Cl] <sub>2</sub> | LiOtBu                          | DMF              | 32              |
| 13    | [Pd(η <sup>3</sup> -C <sub>3</sub> H <sub>5</sub> )Cl] <sub>2</sub> | Et <sub>3</sub> N               | DMF              | 10              |
| 14    | [Pd(η <sup>3</sup> -C <sub>3</sub> H <sub>5</sub> )Cl] <sub>2</sub> | Cs <sub>2</sub> CO <sub>3</sub> | DMA              | 50              |
| 15    | [Pd(η <sup>3</sup> -C <sub>3</sub> H <sub>5</sub> )Cl] <sub>2</sub> | Cs <sub>2</sub> CO <sub>3</sub> | toluene          | 11 <sup>b</sup> |
| 16    | [Pd(η <sup>3</sup> -C <sub>3</sub> H <sub>5</sub> )Cl] <sub>2</sub> | Cs <sub>2</sub> CO <sub>3</sub> | 1,4-dioxane      | 23 <sup>b</sup> |
| 17    | [Pd(η <sup>3</sup> -C <sub>3</sub> H <sub>5</sub> )Cl] <sub>2</sub> | Cs <sub>2</sub> CO <sub>3</sub> | <i>o</i> -xylene | 33              |
| 18    | [Pd(η <sup>3</sup> -C <sub>3</sub> H <sub>5</sub> )Cl] <sub>2</sub> | Cs <sub>2</sub> CO <sub>3</sub> | water            | 3 <sup>c</sup>  |
| 19    | [Pd(η <sup>3</sup> -C <sub>3</sub> H <sub>5</sub> )Cl] <sub>2</sub> | Cs <sub>2</sub> CO <sub>3</sub> | DMF              | 75 <sup>d</sup> |
| 20    | [Pd(η <sup>3</sup> -C <sub>3</sub> H <sub>5</sub> )Cl] <sub>2</sub> | Cs <sub>2</sub> CO <sub>3</sub> | DMF              | 85 <sup>e</sup> |
| 21    | [Pd(η <sup>3</sup> -C <sub>3</sub> H <sub>5</sub> )Cl] <sub>2</sub> | Cs <sub>2</sub> CO <sub>3</sub> | DMF              | 33 <sup>f</sup> |
| 22    | [Pd(η <sup>3</sup> -C <sub>3</sub> H <sub>5</sub> )Cl] <sub>2</sub> | Cs <sub>2</sub> CO <sub>3</sub> | DMF              | 50 <sup>g</sup> |
| 23    | [Pd(η <sup>3</sup> -C <sub>3</sub> H <sub>5</sub> )Cl] <sub>2</sub> | Cs <sub>2</sub> CO <sub>3</sub> | DMF              | 69 <sup>h</sup> |
| 24    | [Pd(η <sup>3</sup> -C <sub>3</sub> H <sub>5</sub> )Cl] <sub>2</sub> | Cs <sub>2</sub> CO <sub>3</sub> | DMF              | 72 <sup>i</sup> |

<sup>a</sup>Condition: 2-bromophenol 0.5 mmol, phenylacetylene 0.6 mmol, solvent 2 mL, base 1 mmol, 130 °C, [Pd] 5×10<sup>-4</sup> mmol, **L** 5×10<sup>-4</sup> mmol, 9 h, GC yield; <sup>b</sup>110 °C; <sup>c</sup>100 °C; <sup>d</sup>no ligand, 24 h; <sup>e</sup>PPh<sub>3</sub>, 24 h; <sup>f</sup>N,N,N',N'-tetra(diphenylphosphinomethyl)-1,2-ethylenediamine, 24 h; <sup>g</sup>2,2',6,6'-tetramethoxy-4,4'-bis(diphenylphosphino)-3,3'-bipyridine (P-Phos), 24 h; <sup>h</sup>1,2-bis(diphenylphosphino)ethane (dppe), 24 h; <sup>i</sup>1,4-bis(diphenylphosphino)butane (dppb), 24 h.

## Characterization Data

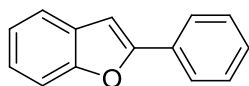

**1**<sup>1</sup>H NMR (400 MHz, CDCl<sub>3</sub>) δ: 7.87 (d, *J* = 7.3 Hz, 2H), 7.59 (d, *J* = 7.1 Hz, 1H), 7.53 (d, *J* = 7.7 Hz, 1H), 7.45 (t, *J* = 7.6 Hz, 2H), 7.36 (t, *J* = 7.1 Hz, 1H), 7.29 (t, *J* = 6.7 Hz, 1H), 7.22 (d, *J* = 6.5 Hz, 1H), 7.03 (s, 1H) ppm.

<sup>13</sup>C NMR (101 MHz, CDCl<sub>3</sub>) δ 155.91, 154.89, 132.50, 130.48, 129.21, 128.78, 128.54, 128.44, 124.93, 124.25, 122.93, 120.90, 111.17, 101.30 ppm.

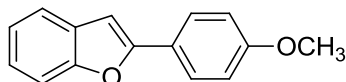

**2**<sup>2</sup>H NMR (400 MHz, CDCl<sub>3</sub>) δ: 7.80 (d, *J* = 8.8 Hz, 2H), 7.55 (d, *J* = 7.2 Hz, 1H), 7.50 (d, *J* = 7.8 Hz, 1H), 7.24 – 7.18 (m, 2H), 6.98 (d, *J* = 8.8 Hz, 2H), 6.89 (s, 1H), 3.87 (s, 3H) ppm.

<sup>13</sup>C NMR (101 MHz, CDCl<sub>3</sub>) δ: 159.99, 156.08, 154.70, 129.49, 126.43, 123.73, 123.36, 122.83, 120.57, 114.26, 110.99, 99.68, 55.38 ppm.

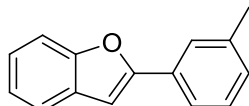

**3**<sup>3</sup>H NMR (400 MHz, CDCl<sub>3</sub>) δ: 7.73 – 7.65 (m, 2H), 7.61 – 7.56 (m, 1H), 7.52 (d, *J* = 7.8 Hz, 1H), 7.34 (m, 1H), 7.31 – 7.26 (m, 1H), 7.25-7.21 (m, 1H), 7.17 (d, *J* = 7.6 Hz, 1H), 7.02 (d, *J* = 0.7 Hz, 1H), 2.43 (s, 3H) ppm.

<sup>13</sup>C NMR (101 MHz, CDCl<sub>3</sub>) δ: 156.09, 154.83, 138.46, 130.37, 129.39, 129.29, 128.71, 125.53, 124.17, 122.89, 122.13, 120.86, 111.15, 101.19, 21.54 ppm.

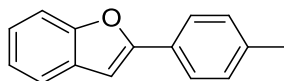

**4**<sup>2</sup>H NMR (400 MHz, CDCl<sub>3</sub>) δ: 7.76 (d, *J* = 8.2 Hz, 2H), 7.57 (d, *J* = 7.3 Hz, 1H), 7.51 (d, *J* = 8.2 Hz, 1H), 7.42 (d, *J* = 8.1 Hz, 1H), 7.27 (s, 1H), 7.24 – 7.20 (m, 1H), 7.14 (d, *J* = 7.9 Hz, 1H), 6.97 (s, 1H), 2.40 (s, 3H) ppm.

<sup>13</sup>C NMR (101 MHz, CDCl<sub>3</sub>) δ: 156.15, 154.72, 138.58, 132.37, 129.47, 129.20, 124.86, 123.97, 122.83, 120.72, 111.07, 100.53, 21.40 ppm.

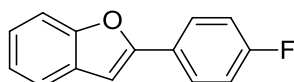

**5**<sup>4</sup>H NMR (400 MHz, CDCl<sub>3</sub>) δ: 7.89 – 7.80 (m, 2H), 7.58 (dd, *J* = 7.6, 0.7 Hz, 1H), 7.51 (d, *J* = 8.2 Hz, 1H), 7.32 – 7.26 (m, 1H), 7.25 – 7.21 (m, 1H), 7.19 – 7.11 (m, 2H), 6.96 (s, 1H) ppm.

<sup>13</sup>C NMR (101 MHz, CDCl<sub>3</sub>) δ: 164.09, 161.62, 154.99, 154.88, 129.16, 126.79, 126.71, 124.28, 123.01, 120.88, 116.00, 115.78, 111.13, 100.99 ppm.

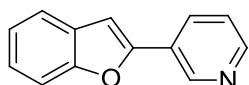

**6**<sup>6</sup> <sup>1</sup>H NMR (400 MHz, CDCl<sub>3</sub>) δ: 9.13 (s, 1H), 8.59 (d, *J* = 4.5 Hz, 1H), 8.18 (d, *J* = 8.0 Hz, 1H), 7.63 (d, *J* = 7.6 Hz, 1H), 7.55 (d, *J* = 8.1 Hz, 1H), 7.43 (dd, *J* = 7.9, 4.9 Hz, 1H), 7.34 (t, *J* = 7.2 Hz, 1H), 7.28 (d, *J* = 7.8 Hz, 1H), 7.15 (s, 1H) ppm.

<sup>13</sup>C NMR (101 MHz, CDCl<sub>3</sub>) δ: 152.92, 149.29, 146.43, 131.88, 128.76, 126.64, 124.96, 123.62, 123.27, 121.22, 111.33, 102.75 ppm.

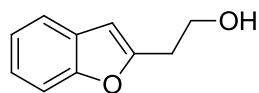

**7**<sup>7</sup> <sup>1</sup>H NMR (400 MHz, CDCl<sub>3</sub>) δ: 7.50 (d, *J* = 7.4 Hz, 1H), 7.43 (d, *J* = 7.7 Hz, 1H), 7.25 – 7.15 (m, 2H), 6.52 (s, 1H), 4.00 (t, *J* = 5.9 Hz, 2H), 3.05 (t, *J* = 6.0 Hz, 2H) ppm.

<sup>13</sup>C NMR (101 MHz, CDCl<sub>3</sub>) δ: 155.94, 154.97, 128.81, 122.93, 122.36, 120.63, 110.86, 103.43, 61.00, 31.79 ppm.

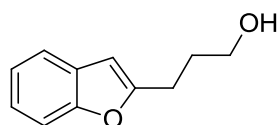

**8**<sup>8</sup> <sup>1</sup>H NMR (400 MHz, CDCl<sub>3</sub>) δ: 7.48 (d, *J* = 8.1 Hz, 1H), 7.41 (d, *J* = 7.7 Hz, 1H), 7.22 – 7.17 (m, 2H), 6.42 (s, 1H), 3.75 (t, *J* = 6.3 Hz, 2H), 2.89 (t, *J* = 7.4 Hz, 2H), 2.10 – 1.96 (m, 3H) ppm.

<sup>13</sup>C NMR (101 MHz, CDCl<sub>3</sub>) δ: 160.13, 154.72, 128.93, 123.22, 122.48, 120.26, 110.75, 102.21, 61.90, 30.69, 24.84 ppm.

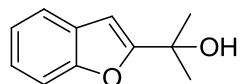

**9**<sup>9</sup> <sup>1</sup>H NMR (400 MHz, CDCl<sub>3</sub>) δ: 7.53 (d, *J* = 7.6 Hz, 1H), 7.46 (d, *J* = 8.0 Hz, 1H), 7.26 (t, *J* = 7.7 Hz, 1H), 7.20 (d, *J* = 7.2 Hz, 1H), 6.58 (s, 1H), 1.68 (s, 6H), 1.25 (s, 1H) ppm.

<sup>13</sup>C NMR (101 MHz, CDCl<sub>3</sub>) δ: 162.99, 154.67, 128.30, 124.00, 122.72, 120.99, 111.18, 100.33, 69.33, 28.75 ppm.

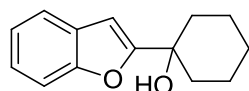

**10**<sup>10</sup> <sup>1</sup>H NMR (400 MHz, CDCl<sub>3</sub>) δ: 7.54 (d, *J* = 7.4 Hz, 1H), 7.46 (d, *J* = 7.9 Hz, 1H), 7.28-7.19 (m, 2H), 6.61 (s, 1H), 2.08 (m, 2H), 1.99 – 1.90 (m, 3H), 1.85 – 1.71 (m, 3H), 1.58 (m, 4H) ppm.

<sup>13</sup>C NMR (101 MHz, CDCl<sub>3</sub>) δ: 162.84, 154.48, 128.30, 123.94, 122.65, 120.96, 111.20, 101.12, 70.57, 36.45, 25.43, 22.00 ppm.

MS (ACPI): Calc'd for C<sub>14</sub>H<sub>16</sub>O<sub>2</sub>, 216.1150; found, 216.02.

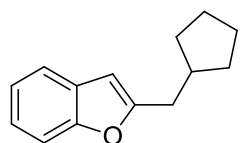

**11**<sup>11</sup> <sup>1</sup>H NMR (400 MHz, CDCl<sub>3</sub>) δ 7.50 – 7.46 (m, 1H), 7.41 (d, *J* = 7.4 Hz, 1H), 7.18 (tt, *J* = 7.3, 5.7 Hz, 2H), 6.38 (s, 1H), 2.75 (d, *J* = 7.3 Hz, 2H), 2.33 – 2.26 (m, 1H), 1.82 (m, 2H), 1.69 – 1.61 (m, 3H), 1.56 (m, 3H) ppm.

<sup>13</sup>C NMR (101 MHz, CDCl<sub>3</sub>) δ: 159.41, 154.56, 122.96, 122.31, 120.13, 110.68, 102.18, 38.63, 34.54, 32.53, 25.07 ppm.

MS (ACPI): Calc'd for C<sub>16</sub>H<sub>15</sub>O, 220.1201; found, 220.03.

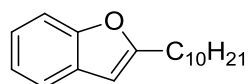

**12**<sup>101</sup>H NMR (400 MHz, CDCl<sub>3</sub>) δ 7.47 (dd, *J* = 6.5, 2.1 Hz, 1H), 7.40 (d, *J* = 7.5 Hz, 1H), 7.22 – 7.14 (m, 2H), 6.37 (s, 1H), 2.75 (t, *J* = 7.6 Hz, 2H), 1.72 (q, *J* = 7.5, 2H), 1.33–1.21 (m, 14H), 0.88 (t, *J* = 7.0 Hz, 3H) ppm.

<sup>13</sup>C NMR (101 MHz, CDCl<sub>3</sub>) δ: 158.77, 153.58, 128.00, 121.96, 121.31, 119.10, 109.66, 100.70, 30.88, 28.57, 28.52, 28.34, 28.30, 28.18, 27.43, 26.67, 21.66, 13.09 ppm.

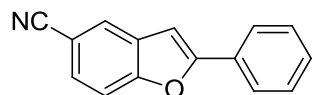

**13**<sup>2</sup> <sup>1</sup>H NMR (400 MHz, CDCl<sub>3</sub>) δ: 7.92 (s, 1H), 7.88 (d, *J* = 7.4 Hz, 2H), 7.59 (q, *J* = 8.5 Hz, 2H), 7.49 (t, *J* = 7.4 Hz, 2H), 7.42 (t, *J* = 7.3 Hz, 1H), 7.07 (s, 1H) ppm.

<sup>13</sup>C NMR (101 MHz, CDCl<sub>3</sub>) δ: 158.37, 156.47, 129.89, 129.61, 129.29, 129.00, 127.88, 125.76, 125.27, 119.50, 112.30, 106.89, 100.75 ppm.

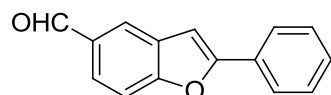

**14**<sup>11</sup> <sup>1</sup>H NMR (400 MHz, CDCl<sub>3</sub>) δ: 10.08 (s, 1H), 8.14 (d, *J* = 1.0 Hz, 1H), 7.87 (dd, *J* = 13.5, 4.8 Hz, 3H), 7.65 (d, *J* = 8.5 Hz, 1H), 7.49 (t, *J* = 7.5 Hz, 2H), 7.42 (d, *J* = 7.3 Hz, 1H), 7.13 (s, 1H) ppm.

<sup>13</sup>C NMR (101 MHz, CDCl<sub>3</sub>) δ: 191.77, 158.30, 157.96, 132.41, 129.86, 129.28, 128.94, 125.95, 125.19, 124.11, 101.52, 77.34, 77.02, 76.70 ppm.

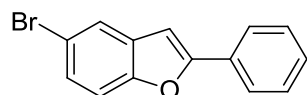

**15**<sup>2</sup> <sup>1</sup>H NMR (400 MHz, CDCl<sub>3</sub>) δ: 7.89 (d, *J* = 7.4 Hz, 2H), 7.52 – 7.41 (m, 4H), 7.38 (t, *J* = 7.4 Hz, 1H), 7.10 (t, *J* = 7.8 Hz, 1H), 7.06 (s, 1H) ppm.

<sup>13</sup>C NMR (101 MHz, CDCl<sub>3</sub>) δ: 155.60, 150.89, 129.42, 128.76, 127.97, 127.80, 126.18, 124.09, 123.17, 118.97, 102.89, 100.77, 76.31, 75.99, 75.67 ppm.

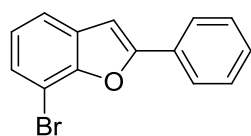

**16**<sup>121</sup> <sup>1</sup>H NMR (400 MHz, CDCl<sub>3</sub>) δ 7.85 (d, *J* = 7.4 Hz, 2H), 7.71 (s, 1H), 7.46 (t, *J* = 7.5 Hz, 2H), 7.39 (q, *J* = 8.4 Hz, 3H), 6.97 (s, 1H) ppm.

<sup>13</sup>C NMR (101 MHz, CDCl<sub>3</sub>) δ: 157.28, 153.92, 131.19, 129.95, 129.02, 128.86, 127.07, 125.05, 123.46, 116.00, 112.61, 100.62 ppm.

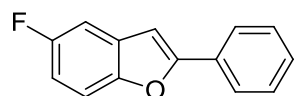

**17**<sup>131</sup> <sup>1</sup>H NMR (400 MHz, CDCl<sub>3</sub>) δ: 7.85 (d, *J* = 7.4 Hz, 2H), 7.45 (dd, *J* = 14.5, 6.8 Hz, 3H), 7.37 (t, *J* = 7.4 Hz, 1H), 7.23 (dd, *J* = 8.6, 2.6 Hz, 1H), 7.04 – 6.94 (m, 2H) ppm.

$^{13}\text{C}$  NMR (101 MHz,  $\text{CDCl}_3$ )  $\delta$ : 157.66, 151.08, 130.09, 128.89, 128.84, 124.98, 111.98, 111.77, 111.72, 111.68, 106.44, 106.19, 101.43, 101.39 ppm.

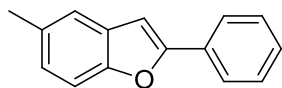

**18**<sup>2</sup>  $^1\text{H}$  NMR (400 MHz,  $\text{CDCl}_3$ )  $\delta$ : 7.85 (d,  $J = 7.2$  Hz, 2H), 7.44 (t,  $J = 6.9$  Hz, 2H), 7.40 (d,  $J = 8.4$  Hz, 1H), 7.35 (dd,  $J = 12.8, 5.3$  Hz, 2H), 7.09 (d,  $J = 9.7$  Hz, 1H), 6.96 (s, 1H), 2.45 (s, 3H) ppm.

$^{13}\text{C}$  NMR (101 MHz,  $\text{CDCl}_3$ )  $\delta$ : 155.99, 153.35, 132.35, 130.64, 129.32, 128.76, 128.42, 125.54, 124.86, 120.73, 110.66, 101.09, 21.36 ppm.

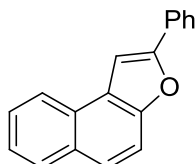

**19**<sup>8</sup>  $^1\text{H}$  NMR (400 MHz,  $\text{CDCl}_3$ )  $\delta$ : 8.18 (d,  $J = 8.1$  Hz, 1H), 7.95 (t,  $J = 7.2$  Hz, 3H), 7.72 (q,  $J = 9.0$  Hz, 2H), 7.60 (t,  $J = 7.5$  Hz, 1H), 7.53 (s, 1H), 7.51 – 7.46 (m, 3H), 7.36 (m, 1H) ppm.

$^{13}\text{C}$  NMR (101 MHz,  $\text{CDCl}_3$ )  $\delta$ : 155.35, 152.34, 130.61, 130.39, 128.85, 128.80, 128.34, 128.27, 127.58, 126.26, 125.18, 124.64, 124.57, 124.52, 123.53, 123.45, 112.30, 100.44 ppm.

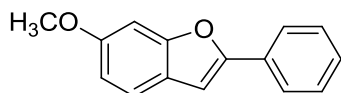

**20**<sup>151</sup>  $^1\text{H}$  NMR (400 MHz,  $\text{CDCl}_3$ )  $\delta$ : 7.85 – 7.78 (m, 2H), 7.43 (t,  $J = 8.3$  Hz, 3H), 7.32 (t,  $J = 7.4$  Hz, 1H), 7.08 (d,  $J = 2.0$  Hz, 1H), 6.95 (d,  $J = 0.7$  Hz, 1H), 6.87 (dd,  $J = 8.5, 2.3$  Hz, 1H), 3.88 (s, 3H) ppm.

$^{13}\text{C}$  NMR (101 MHz,  $\text{CDCl}_3$ )  $\delta$ : 158.04, 155.13, 130.69, 128.75, 128.04, 124.43, 122.53, 120.99, 111.96, 101.14, 95.85, 55.74 ppm.

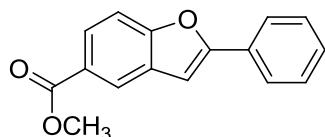

**21**<sup>111</sup>  $^1\text{H}$  NMR (400 MHz,  $\text{CDCl}_3$ )  $\delta$ : 8.32 (d,  $J = 1.5$  Hz, 1H), 8.02 (dd,  $J = 8.6, 1.7$  Hz, 1H), 7.91 – 7.84 (m, 2H), 7.55 (d,  $J = 8.6$  Hz, 1H), 7.47 (t,  $J = 7.5$  Hz, 2H), 7.38 (t,  $J = 7.4$  Hz, 1H), 7.08 (s, 1H), 3.95 (s, 3H) ppm.

$^{13}\text{C}$  NMR (101 MHz,  $\text{CDCl}_3$ )  $\delta$ : 167.31, 157.37, 129.87, 129.24, 129.04, 128.88, 126.05, 125.30, 125.06, 123.31, 111.01, 101.52, 52.14 ppm.

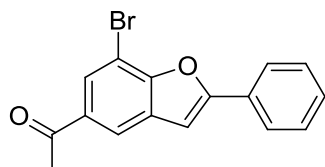

**22**<sup>1</sup>  $^1\text{H}$  NMR (400 MHz,  $\text{CDCl}_3$ )  $\delta$ : 8.24 (d,  $J = 1.7$  Hz, 1H), 7.96 (dd,  $J = 8.6, 1.8$  Hz, 1H), 7.88 (d,  $J = 7.3$  Hz, 2H), 7.56 (d,  $J = 8.6$  Hz, 1H), 7.47 (t,  $J = 7.5$  Hz, 2H), 7.39 (t,  $J = 6.9$  Hz, 1H), 7.09 (s, 1H), 2.68 (s, 3H) ppm.

$^{13}\text{C}$  NMR (101 MHz,  $\text{CDCl}_3$ )  $\delta$ : 197.70, 157.56, 157.45, 132.89, 129.80, 129.35, 129.11, 128.91, 125.08, 122.17, 111.17, 101.63, 26.82 ppm.

MS (ACPI): Calc'd for  $\text{C}_{16}\text{H}_{11}\text{BrO}_2$ , 315.1613; found, 315.00.

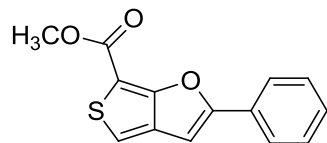

$^{23}\text{H}$  NMR (400 MHz,  $\text{CDCl}_3$ )  $\delta$ : 7.84 (d,  $J = 7.3$  Hz, 2H), 7.45 (t,  $J = 7.3$  Hz, 2H), 7.39 (t,  $J = 7.3$  Hz, 1H), 7.18 (s, 1H), 6.72 (s, 1H), 3.96 (s, 3H) ppm.

$^{13}\text{C}$  NMR (101 MHz,  $\text{CDCl}_3$ )  $\delta$ : 164.85, 161.69, 157.58, 136.99, 129.82, 129.37, 128.80, 125.07, 114.47, 97.58, 52.11 ppm.

MS (ACPI): Calc'd for  $\text{C}_{14}\text{H}_{10}\text{O}_3\text{S}$ , 258.2924; found, 258.17.

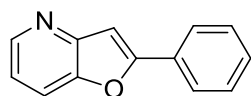

$^{24}\text{H}$  NMR (400 MHz,  $\text{CDCl}_3$ )  $\delta$ : 8.53 (d,  $J = 4.6$  Hz, 1H), 7.92 (d,  $J = 7.6$  Hz, 2H), 7.80 (d,  $J = 8.2$  Hz, 1H), 7.49 (t,  $J = 7.5$  Hz, 2H), 7.43 (t,  $J = 7.2$  Hz, 1H), 7.23 (m, 2H) ppm.

$^{13}\text{C}$  NMR (101 MHz,  $\text{CDCl}_3$ )  $\delta$ : 159.69, 148.99, 148.04, 145.97, 129.69, 129.60, 128.94, 125.34, 118.80, 117.91, 117.88, 102.36 ppm.

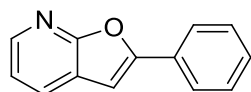

$^{25}\text{H}$  NMR (400 MHz,  $\text{CDCl}_3$ )  $\delta$ : 8.31 (dd,  $J = 4.9, 1.6$  Hz, 1H), 7.98 – 7.87 (m, 3H), 7.48 (t,  $J = 7.4$  Hz, 2H), 7.44 – 7.37 (m, 1H), 7.26 – 7.20 (m, 1H), 7.03 (s, 1H) ppm.

$^{13}\text{C}$  NMR (101 MHz,  $\text{CDCl}_3$ )  $\delta$ : 161.53, 155.80, 143.39, 129.87, 129.46, 129.40, 128.92, 125.21, 121.70, 119.57, 100.01 ppm.

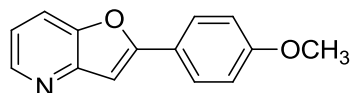

$^{26}\text{H}$  NMR (400 MHz,  $\text{CDCl}_3$ )  $\delta$ : 8.49 (d,  $J = 4.9$  Hz, 1H), 7.85 (t,  $J = 9.4$  Hz, 3H), 7.24 (dd,  $J = 8.2, 5.1$  Hz, 1H), 7.19 (s, 1H), 7.01 (d,  $J = 8.8$  Hz, 2H), 3.88 (s, 3H) ppm.

$^{13}\text{C}$  NMR (101 MHz,  $\text{CDCl}_3$ )  $\delta$ : 161.18, 148.25, 148.06, 143.68, 127.23, 121.84, 118.80, 118.28, 114.50, 99.74, 55.46 ppm.

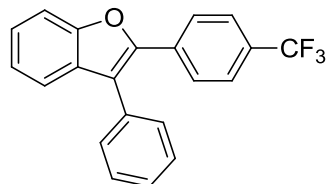

$^{27}\text{H}$  NMR (600 MHz,  $\text{CDCl}_3$ )  $\delta$ : 7.72 (d,  $J = 7.9$  Hz, 2H), 7.65 – 7.60 (m, 4H), 7.58 (d,  $J = 8.2$  Hz, 1H), 7.49 (d,  $J = 7.5$  Hz, 1H), 7.36 (m, 4H), 7.27 (d,  $J = 7.5$  Hz, 1H) ppm.

$^{13}\text{C}$  NMR (151 MHz,  $\text{CDCl}_3$ )  $\delta$ : 154.10, 151.29, 136.89, 130.16, 130.07, 129.59, 128.84, 128.63, 127.24, 125.94, 125.02, 123.24, 119.67, 116.11, 111.33 ppm.

MS (ACPI): Calc'd for  $\text{C}_{14}\text{H}_{10}\text{O}_3\text{S}$ , 338.3225; found, 338.26.

## References

1. Y. Liang, S. Tang, X.-D. Zhang, L.-Q. Mao, Y.-X. Xie, J.-H. Li, *Org. Lett.*, 2006, **8**, 3017-3020.
2. C. G. Bates, P. Saejueng, J. M. Murphy, D. Venkataraman, *Org. Lett.* 2002, **4**, 4727-4729.
3. M. Carril, A. Correa, C. Bolm, *Angew. Chem. Int. Ed.* 2008, **47**, 4862–4865.
4. A. Ohtaka, T. Teratani, R. Fujii, K. Ikeshita, T. Kawashima, K. Tatsumi, O. Shimomura, R. Nomura, *J. Org. Chem.*, 2011, **76**, 4052–4060.
5. R. Cano, M. Yus, D. - J. Ramón, *Tetrahedron*, 2012, **68**, 1393-1400.
6. S. E. Denmark, R. C. Smith, W.-T. T. Chang, J. M. Muhuhi, *J. Am. Chem. Soc.*, 2009, **131**, 3104–3118.
7. M. Watanabe, M. Kawada, T. Hirata, Y. Maki, I. Imada, *Chem. Pharm. Bull.*, 1984, **32**, 3551-3560.
8. L. Zhou, Y. Shi, Q. Xiao, Y.-Z Liu, F. Ye, Y. Zhang, J.-B. Wang, *Org. Lett.*, 2011, **13**, 968-971.
9. N. G. Kundu, M. Pal, J. S. Mahanty, M. De, *J. Chem. Soc., Perkin Trans.*, 1997, **1**, 2815-2820.
10. J. -R. Wang, K. Manabe, *J. Org. Chem.*, 2010, **75**, 5340–5342.
11. S.-H. Wang, P.-H. Li, L. Yu, L. Wang, *Org. Lett.*, 2011, **13**, 5968-5971.
12. N. Takeda, O. Miyata, T. Naito, *Eur. J. Org. Chem.*, 2007, 1491–1509.
13. J. Yang, G. -D. Shen, D. -B. Chen, *Synth. Commun.*, 2013, **43**, 837 - 847.
14. T. Sakamoto, Y. Kondo, R. Watanabe, H. Yamanaka, *Chem. Pharm. Bull.*, 1986, **34**, 2719-2724.
15. S. K. Chittimalla, T.-C. Chang, T.-C. Liu, H.-P. Hsieh, C.-C. Liao, *Tetrahedron*, 2008, **64**, 2586-2595.



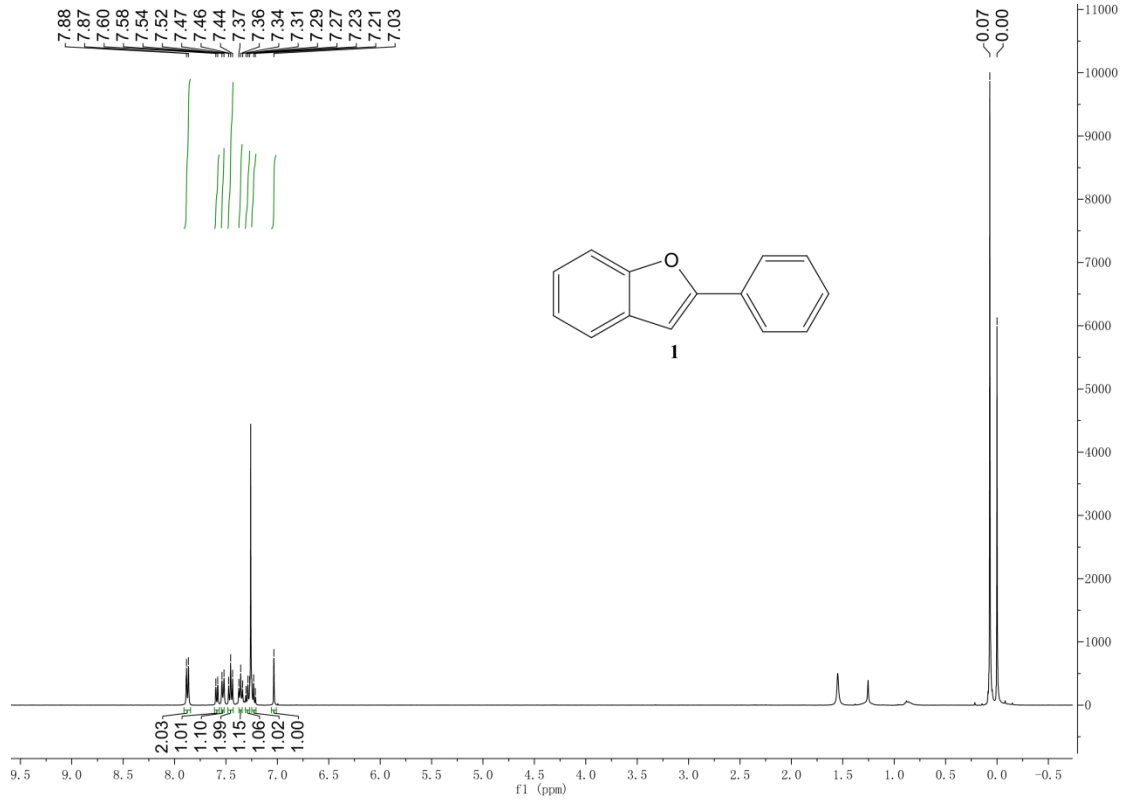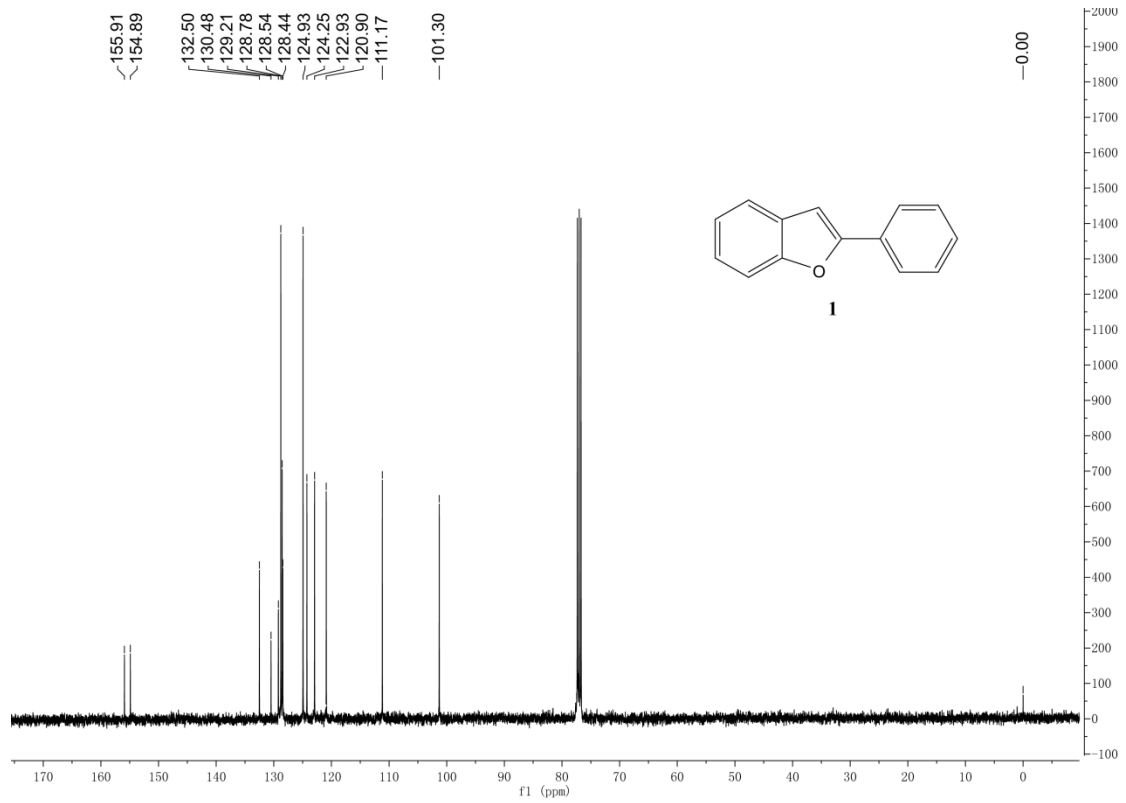

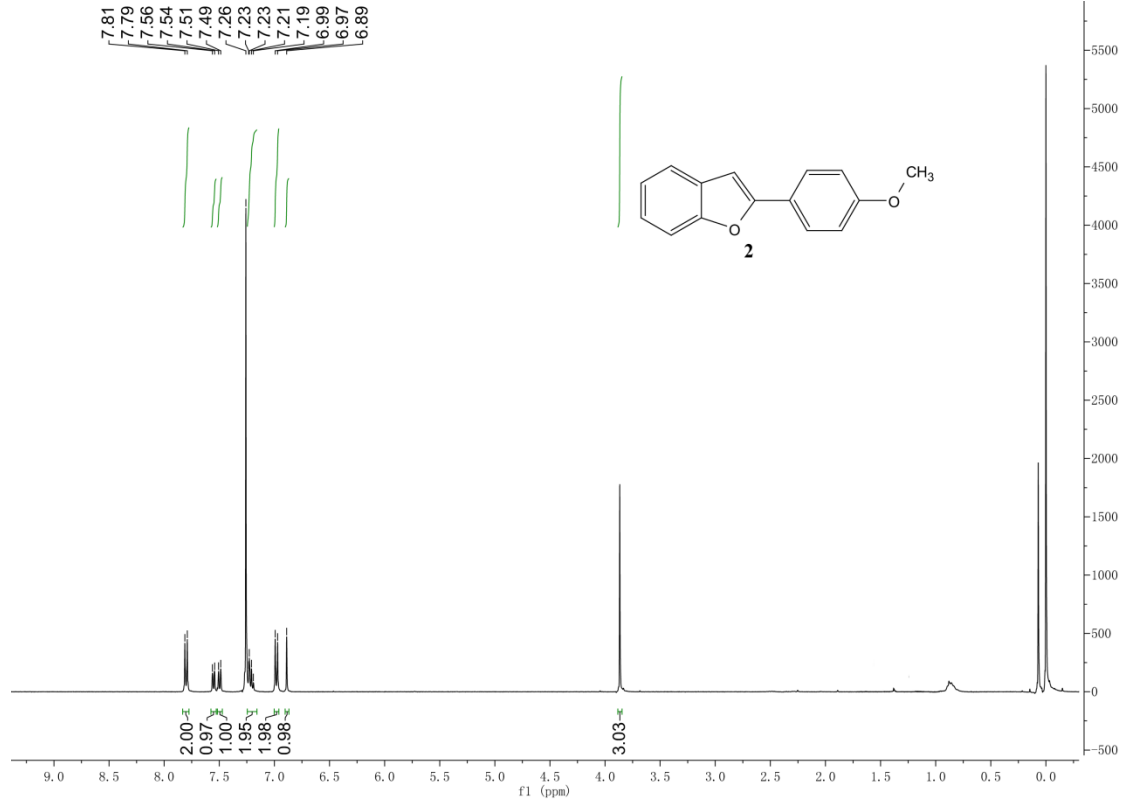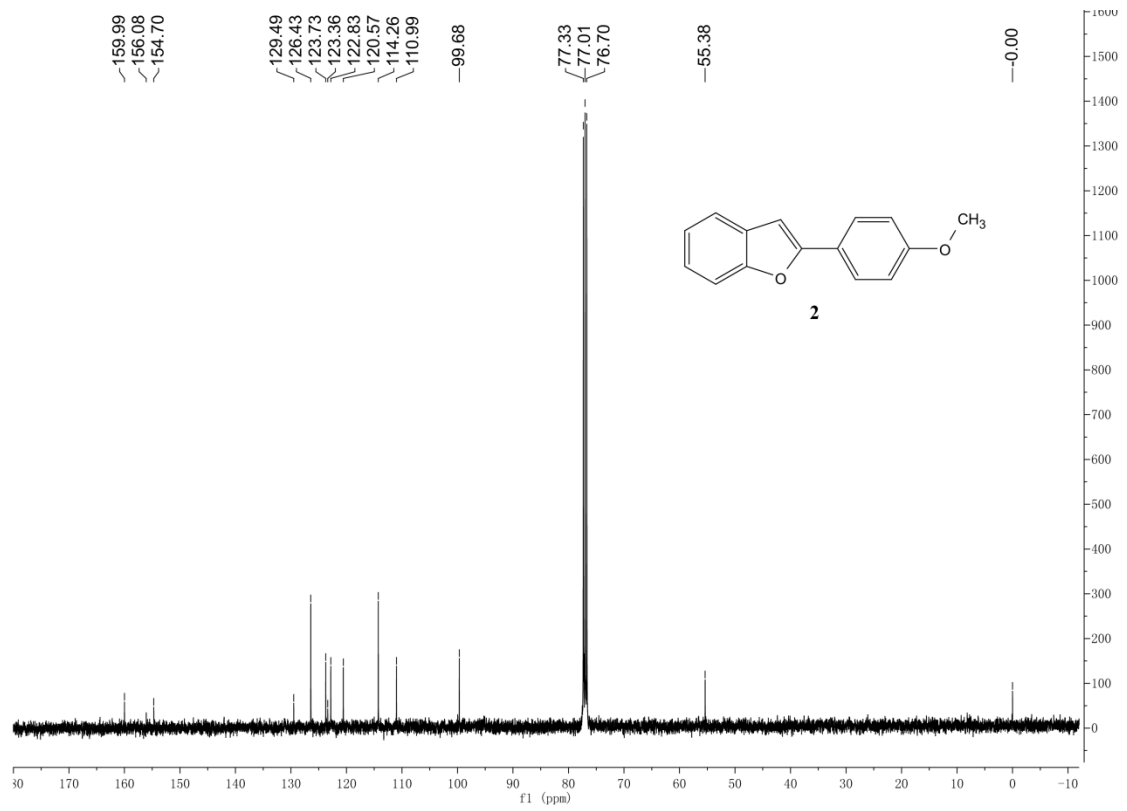

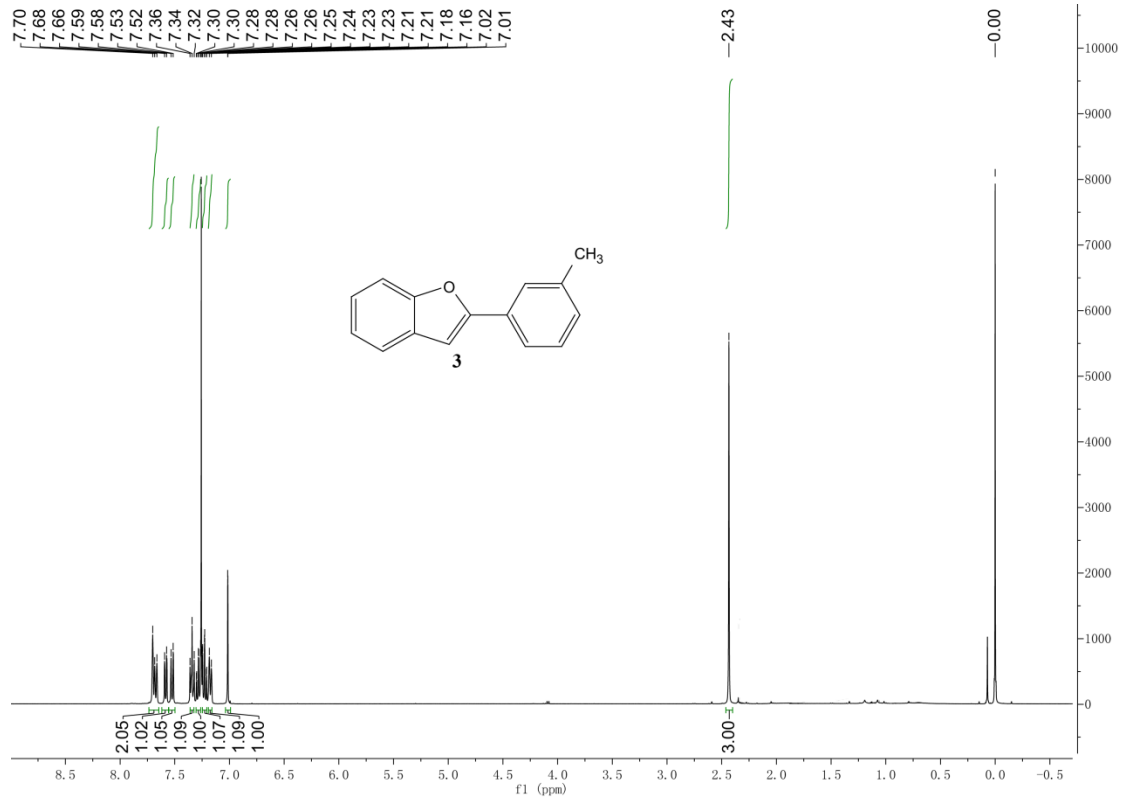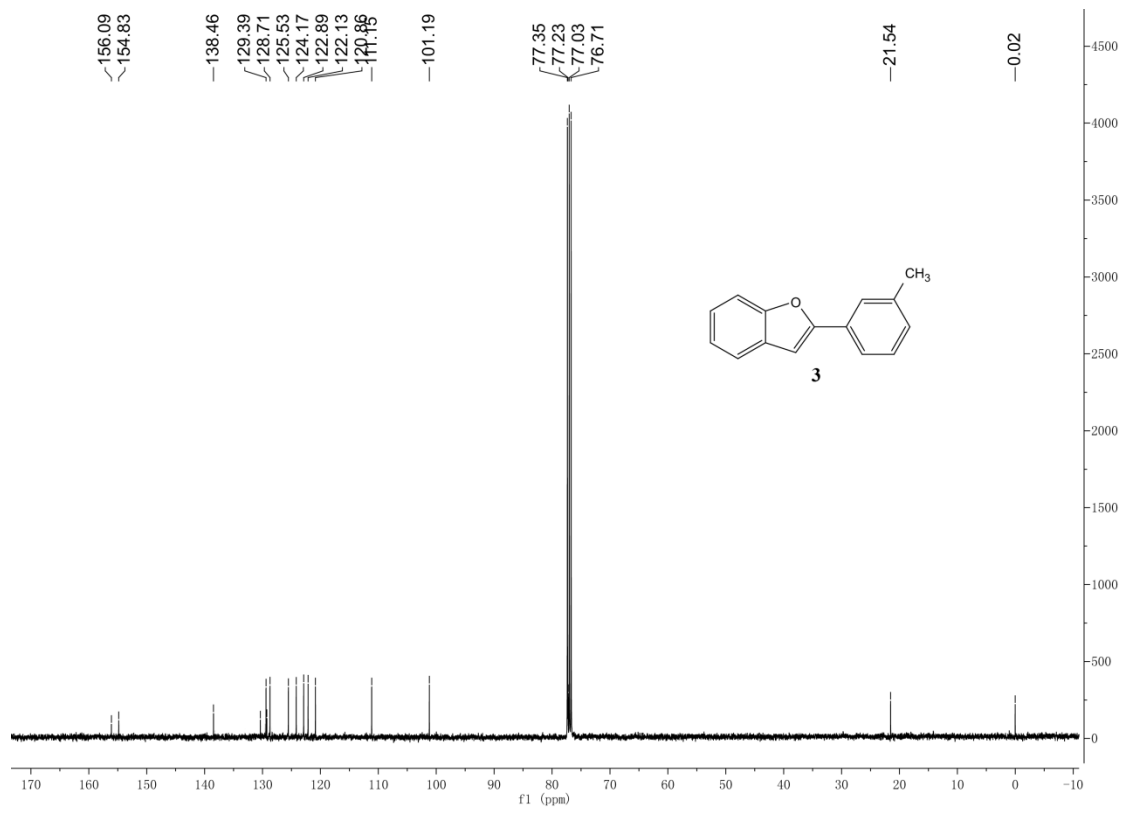

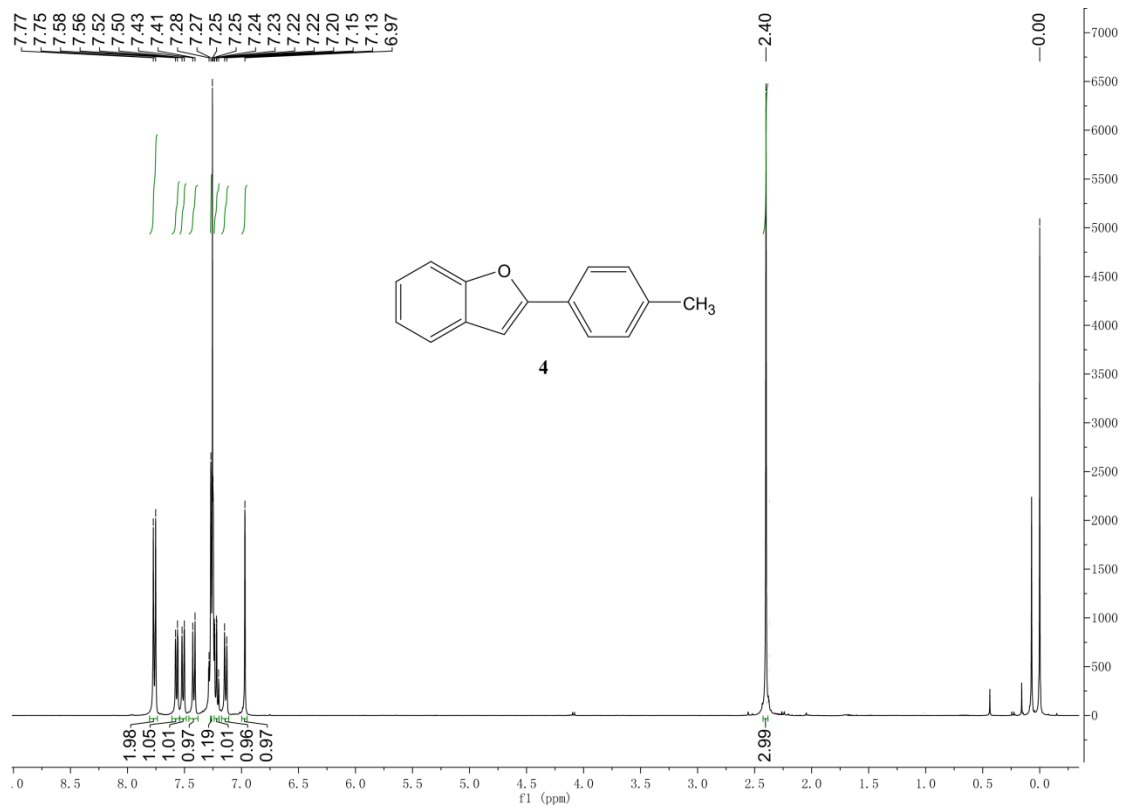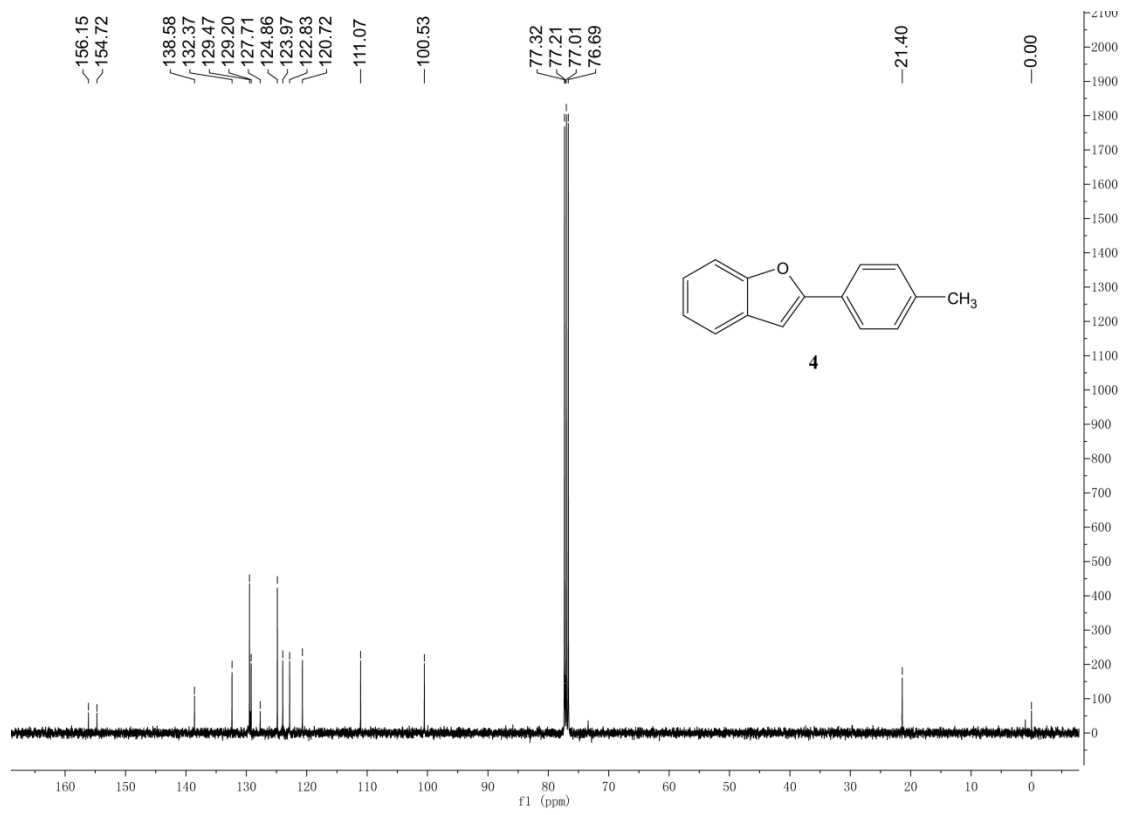

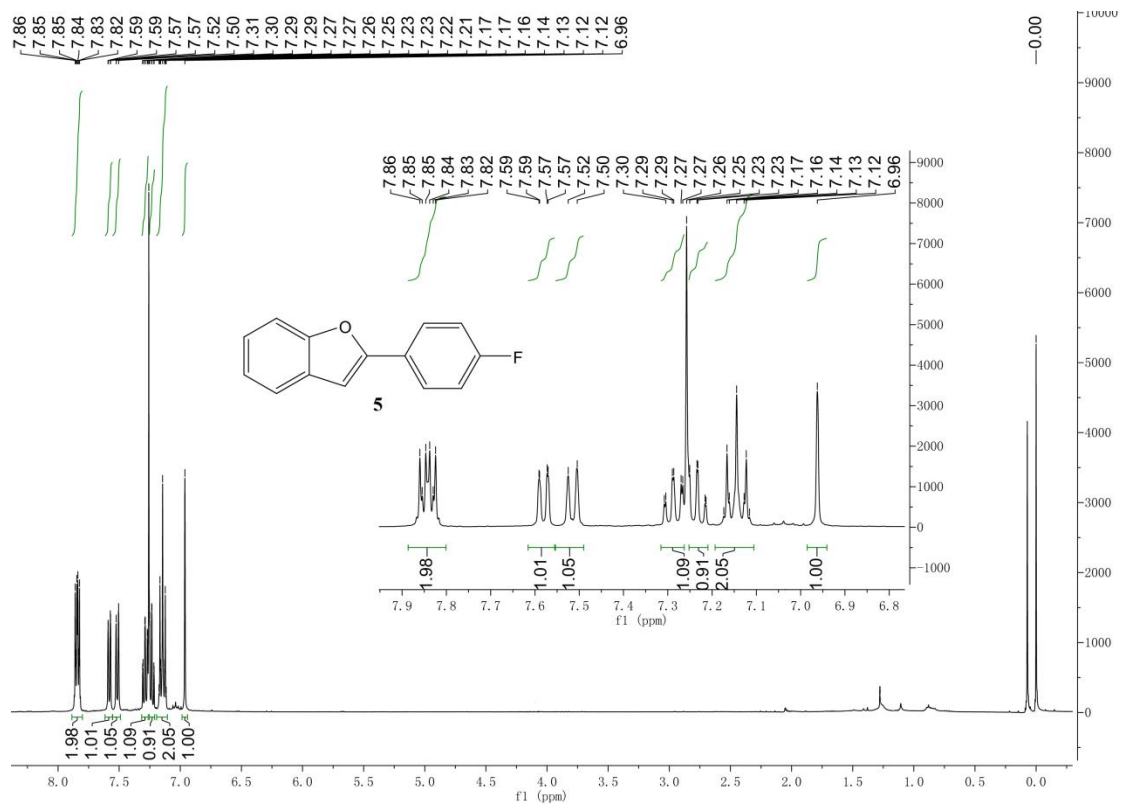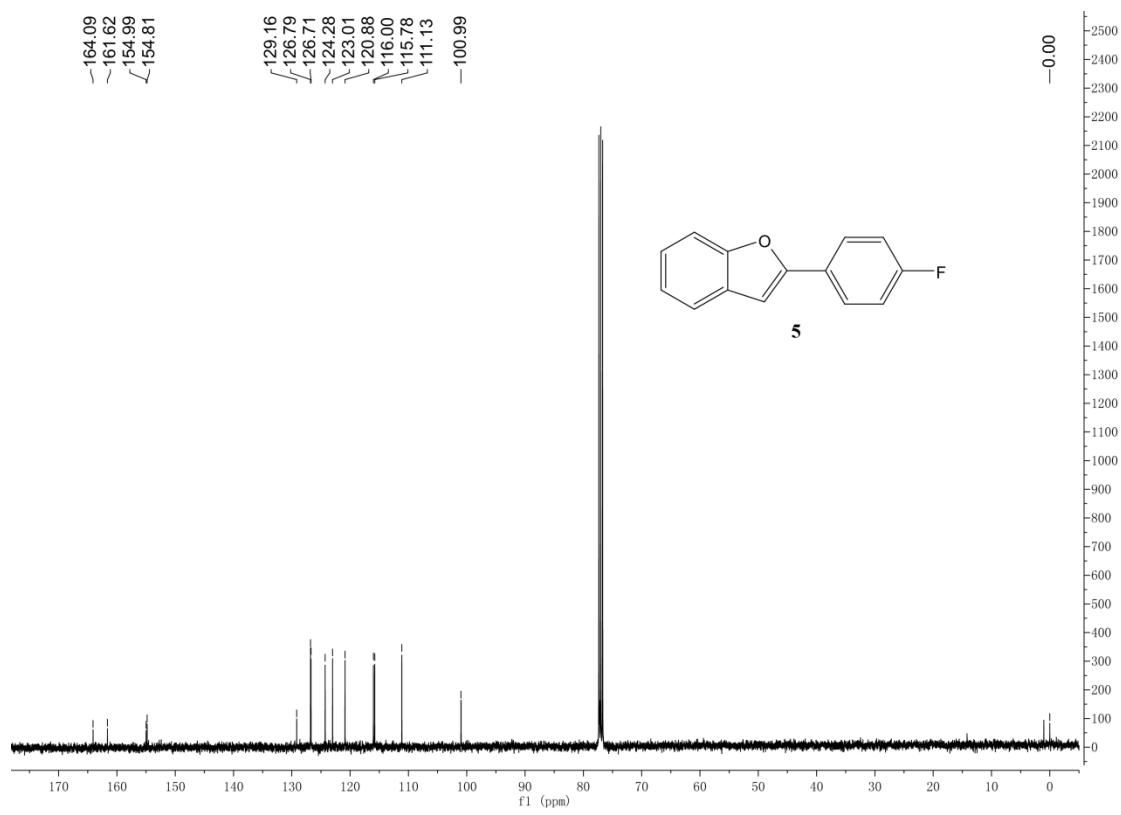

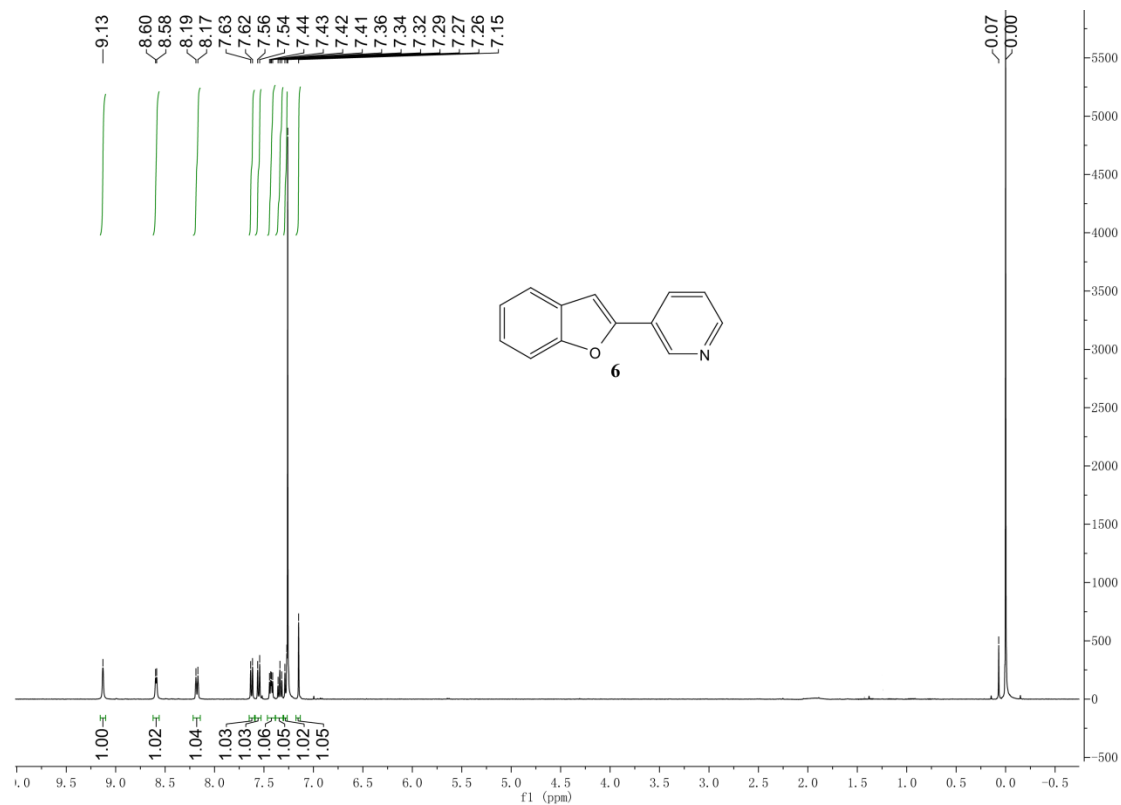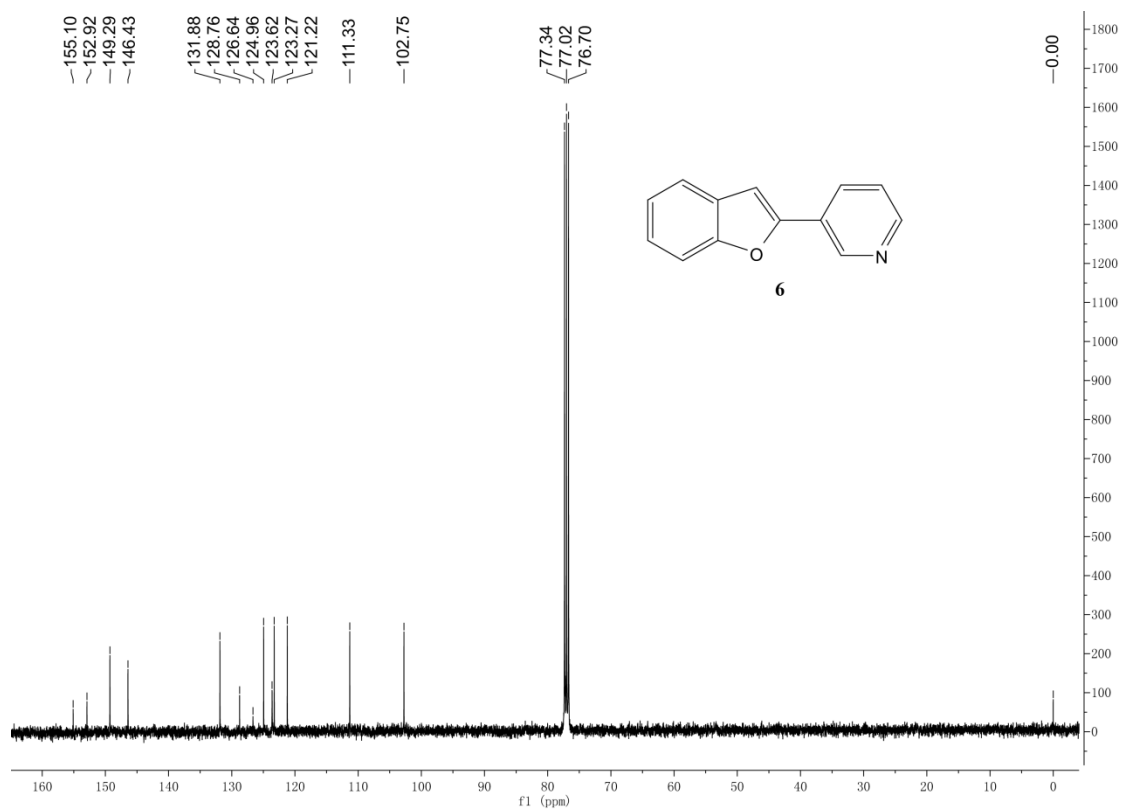

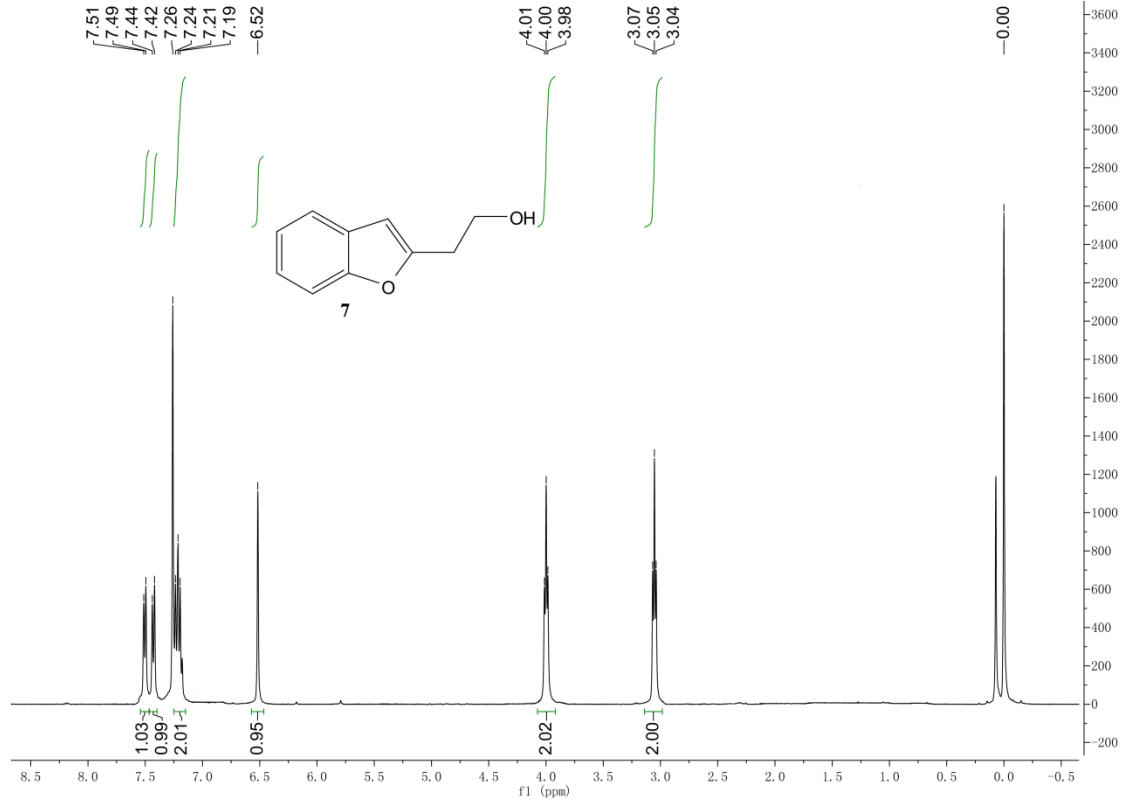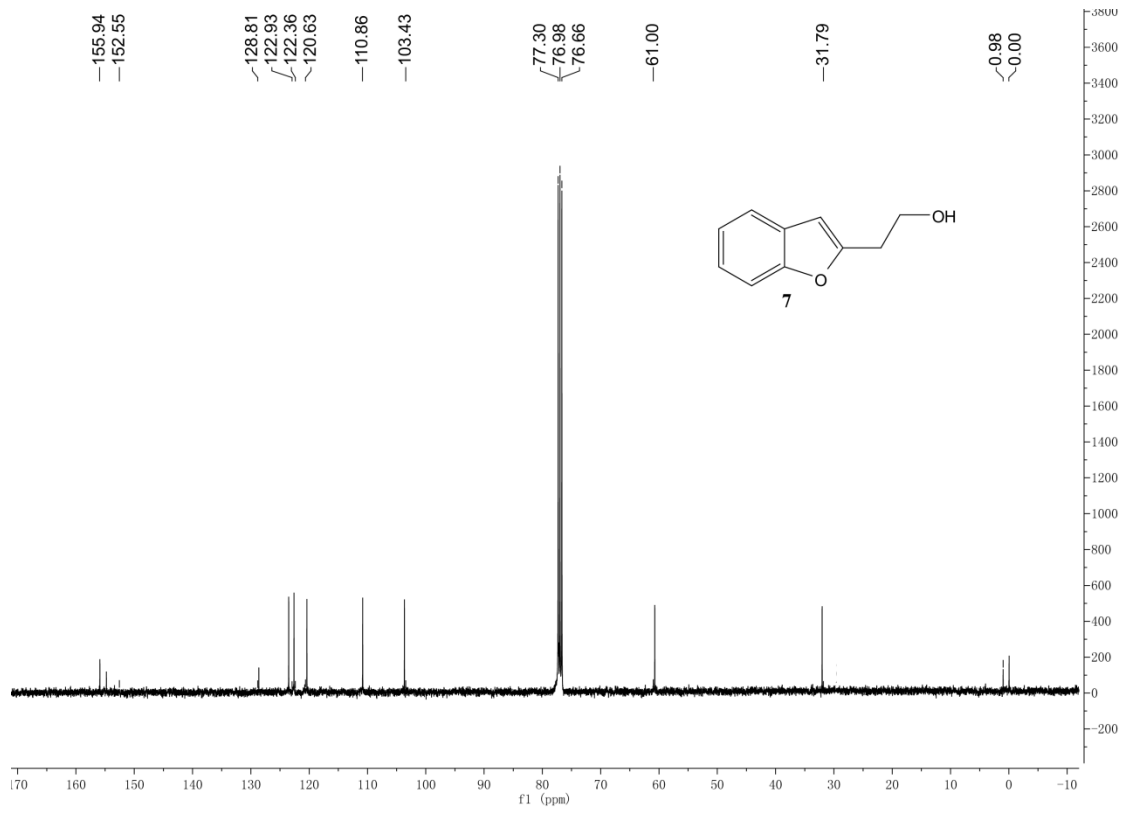

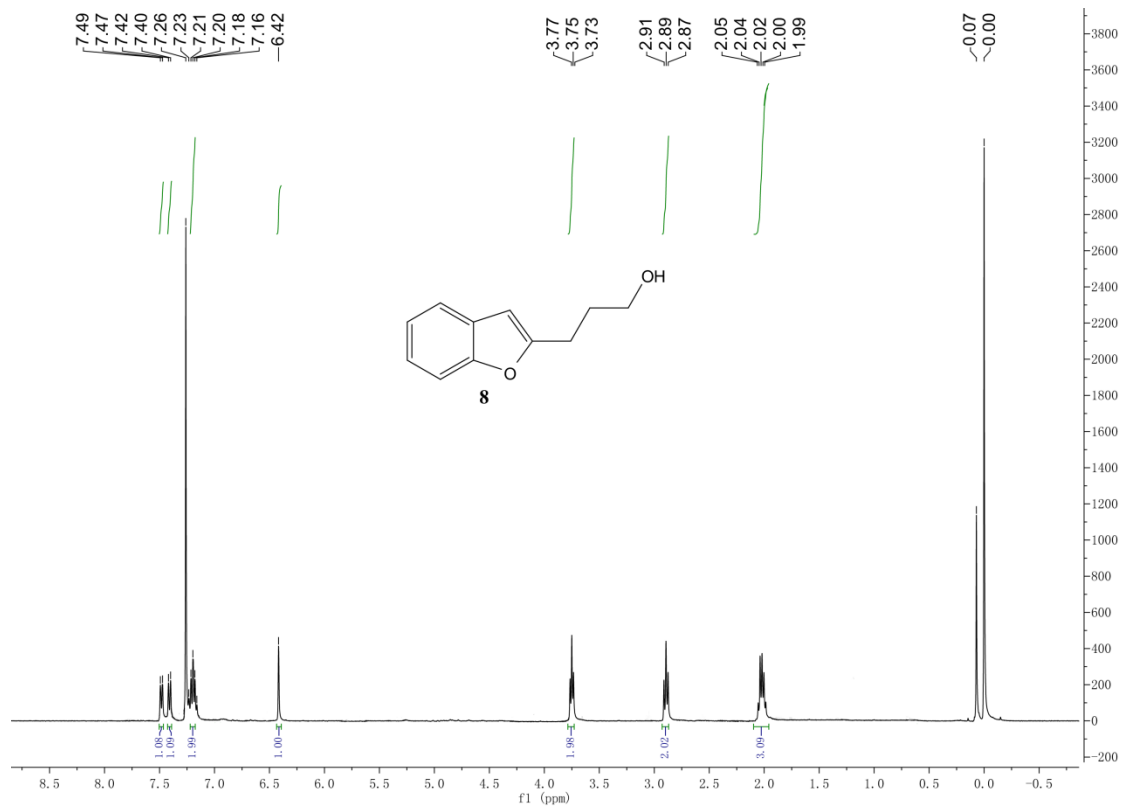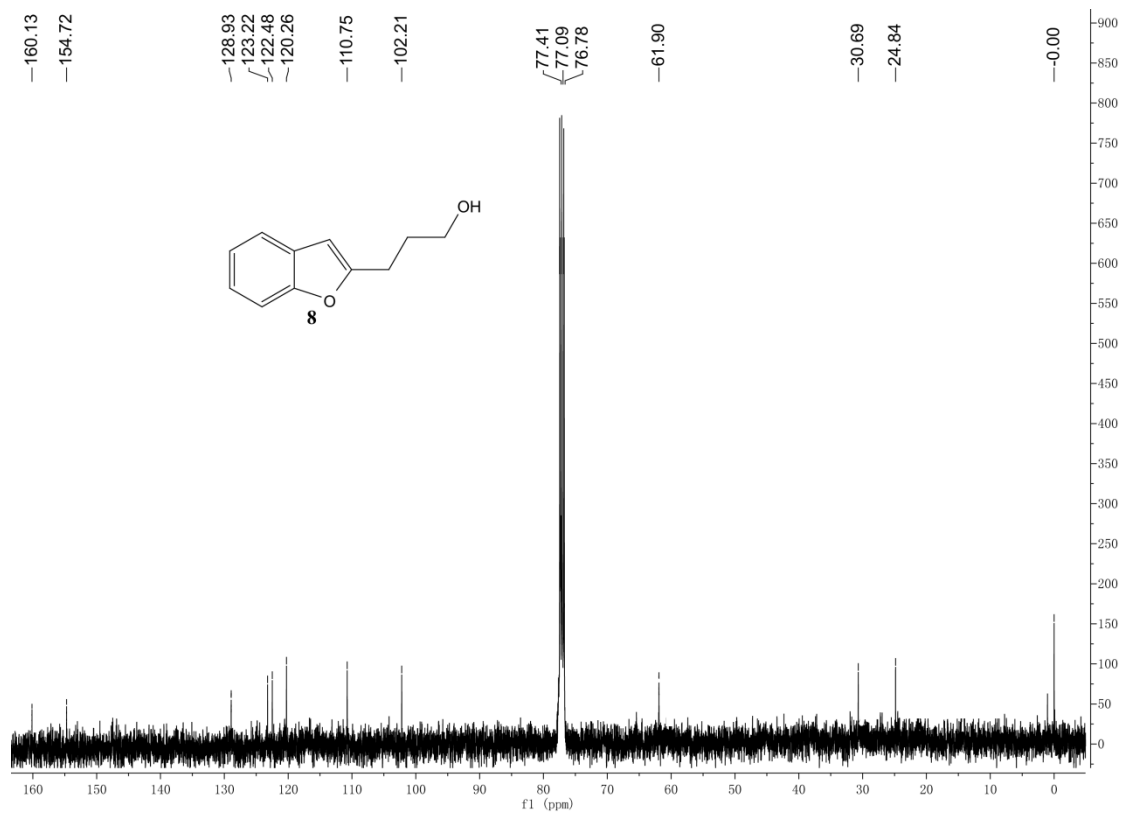



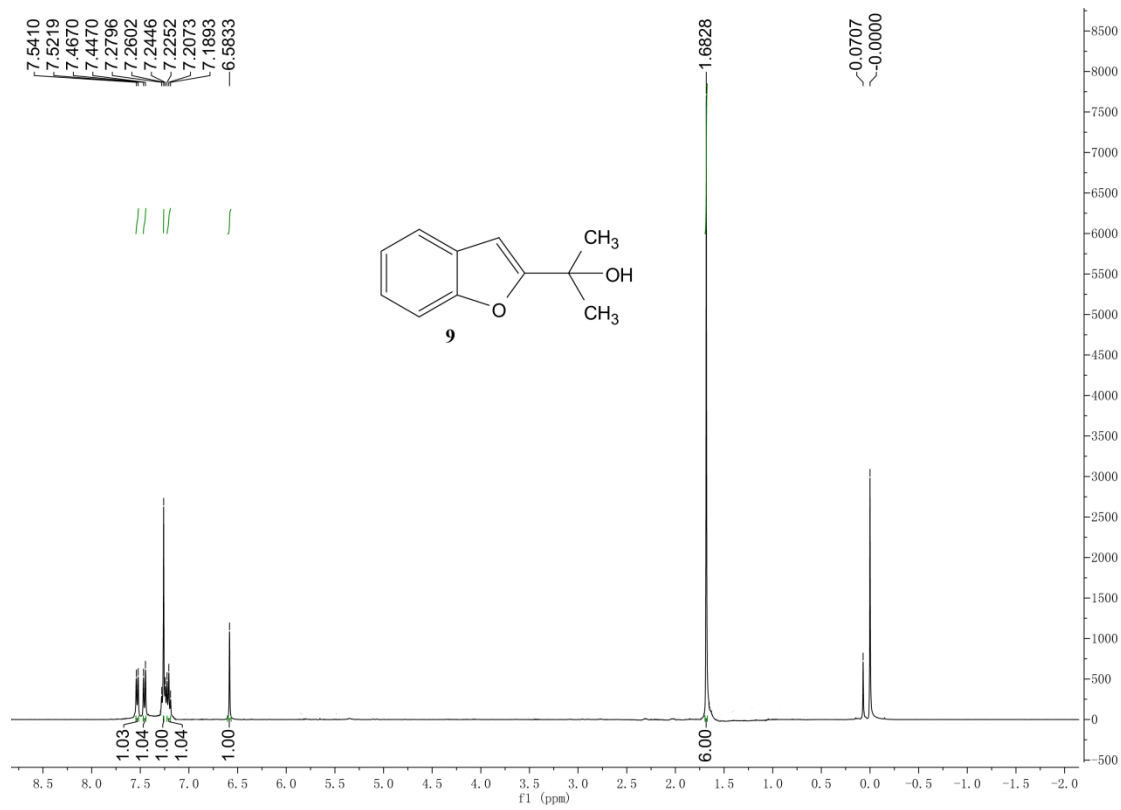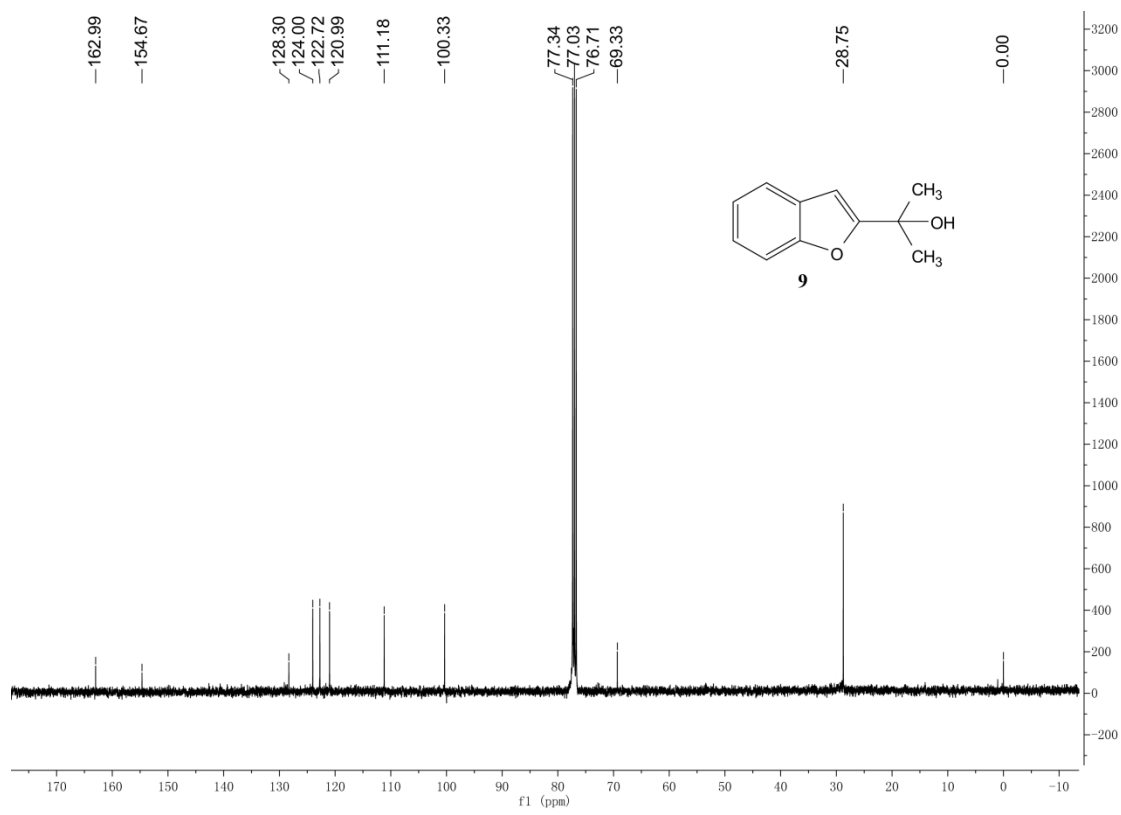

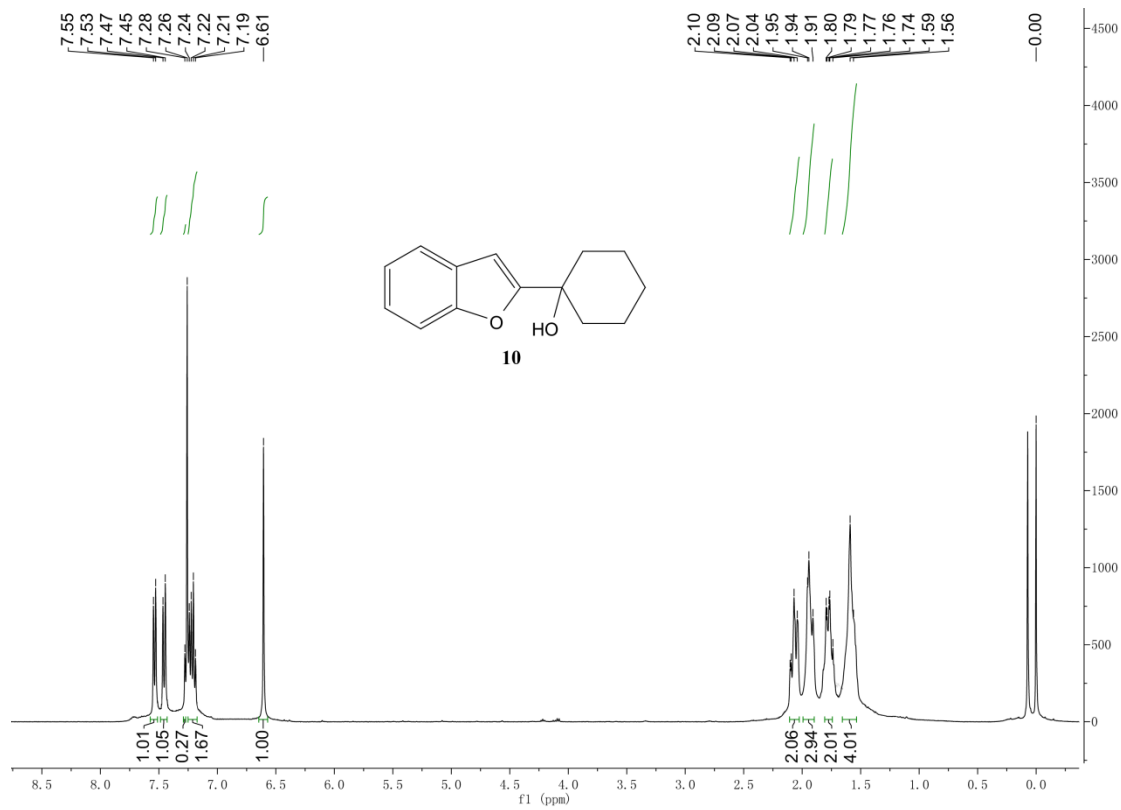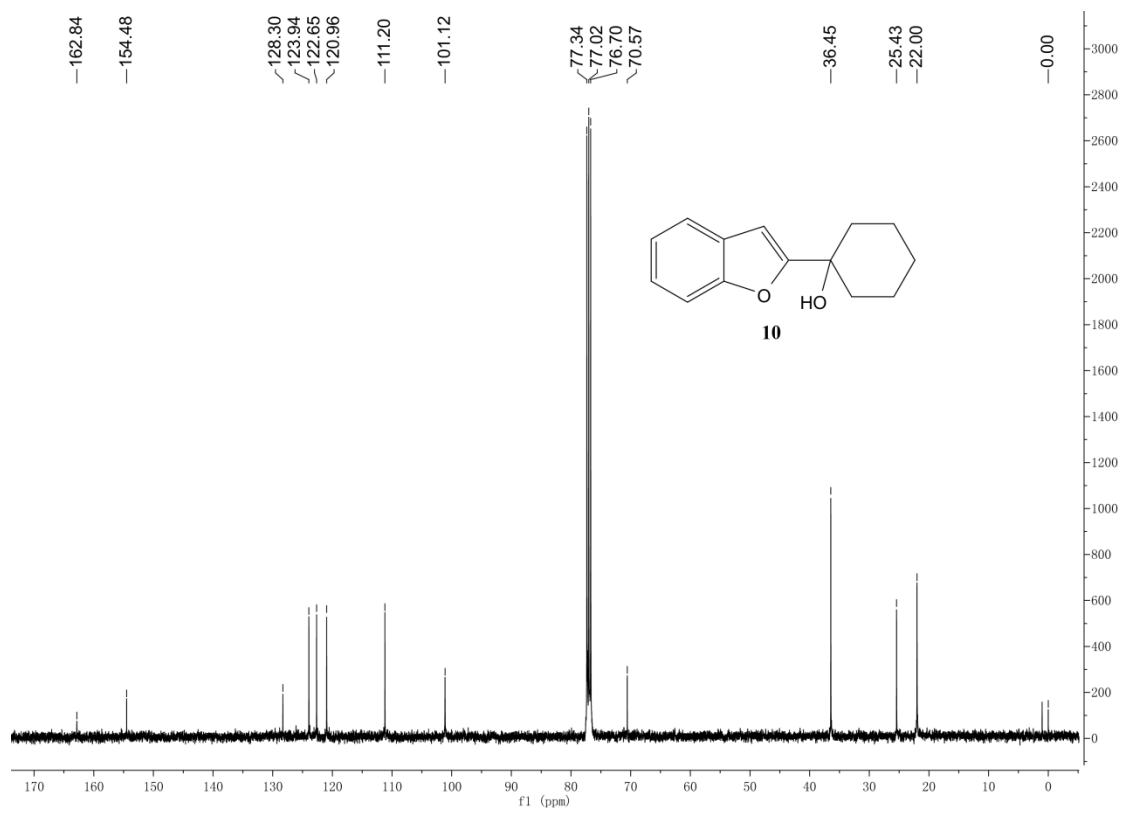

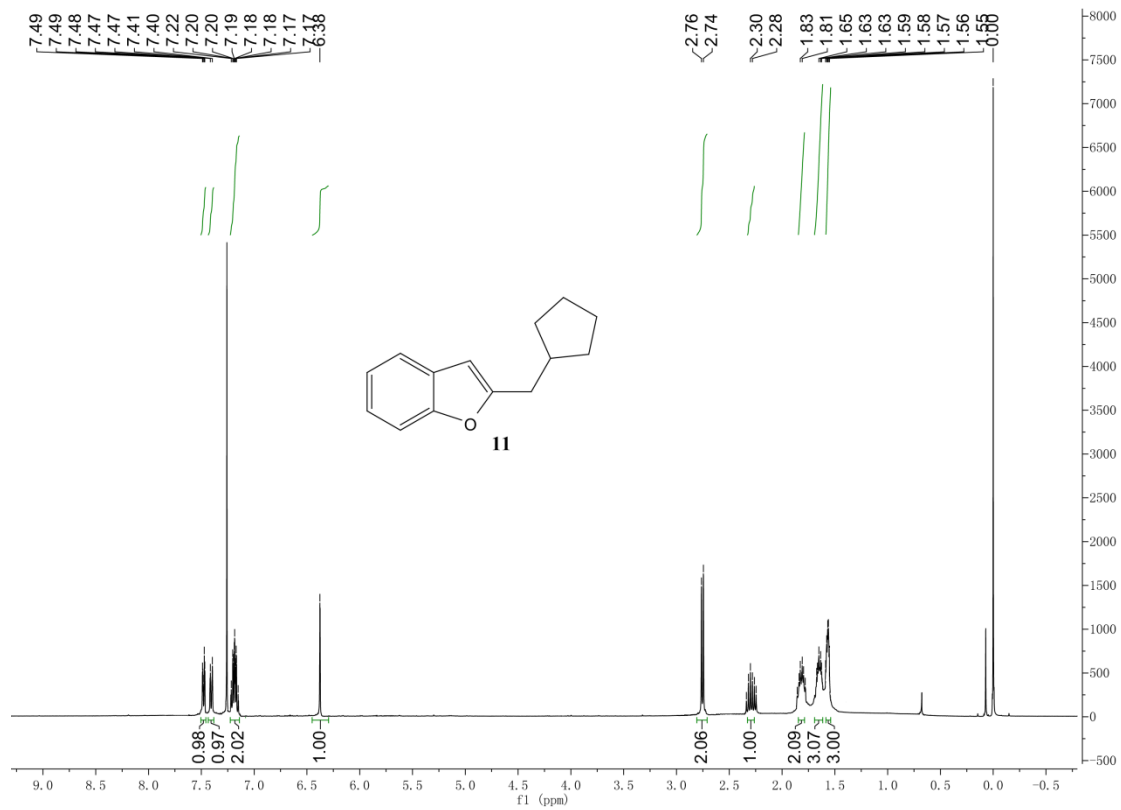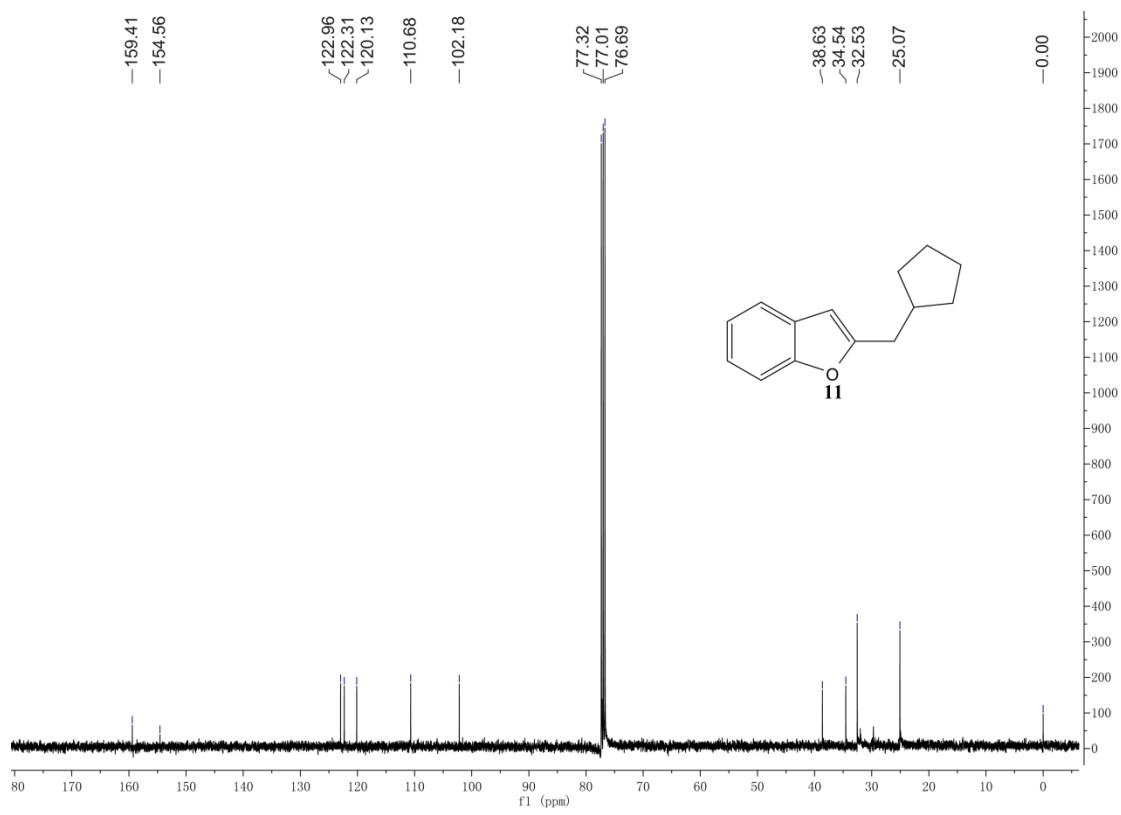

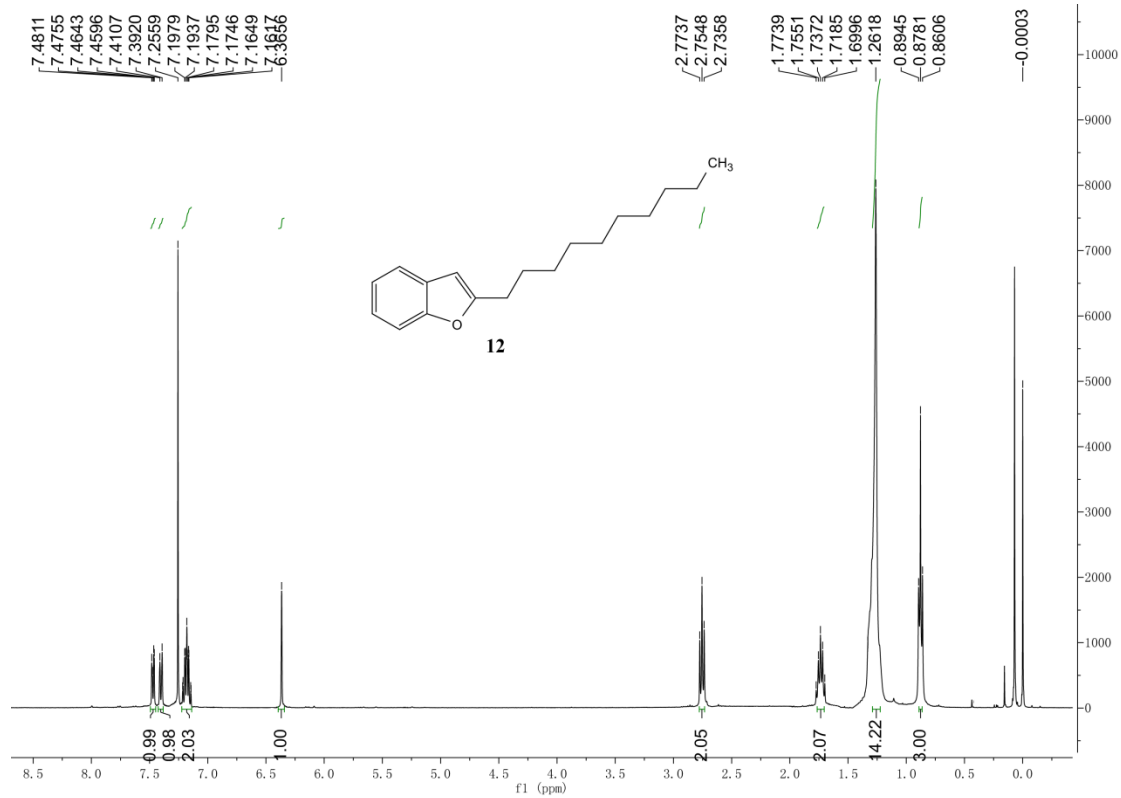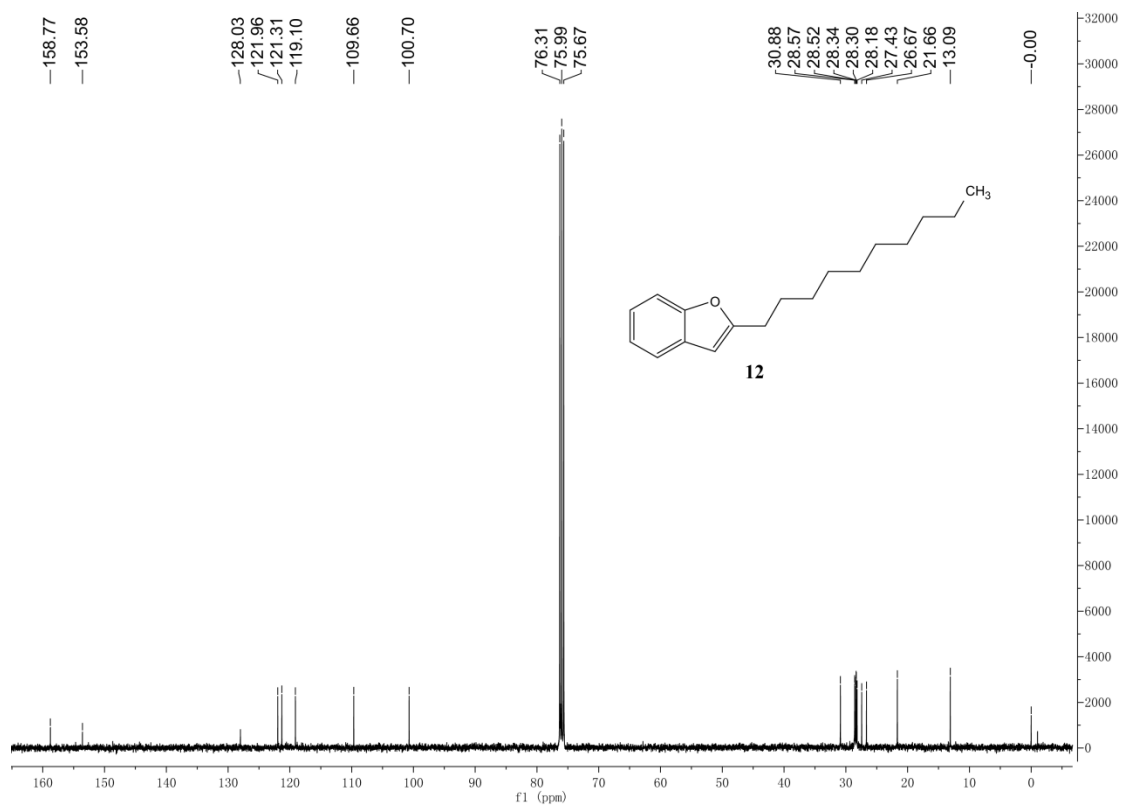

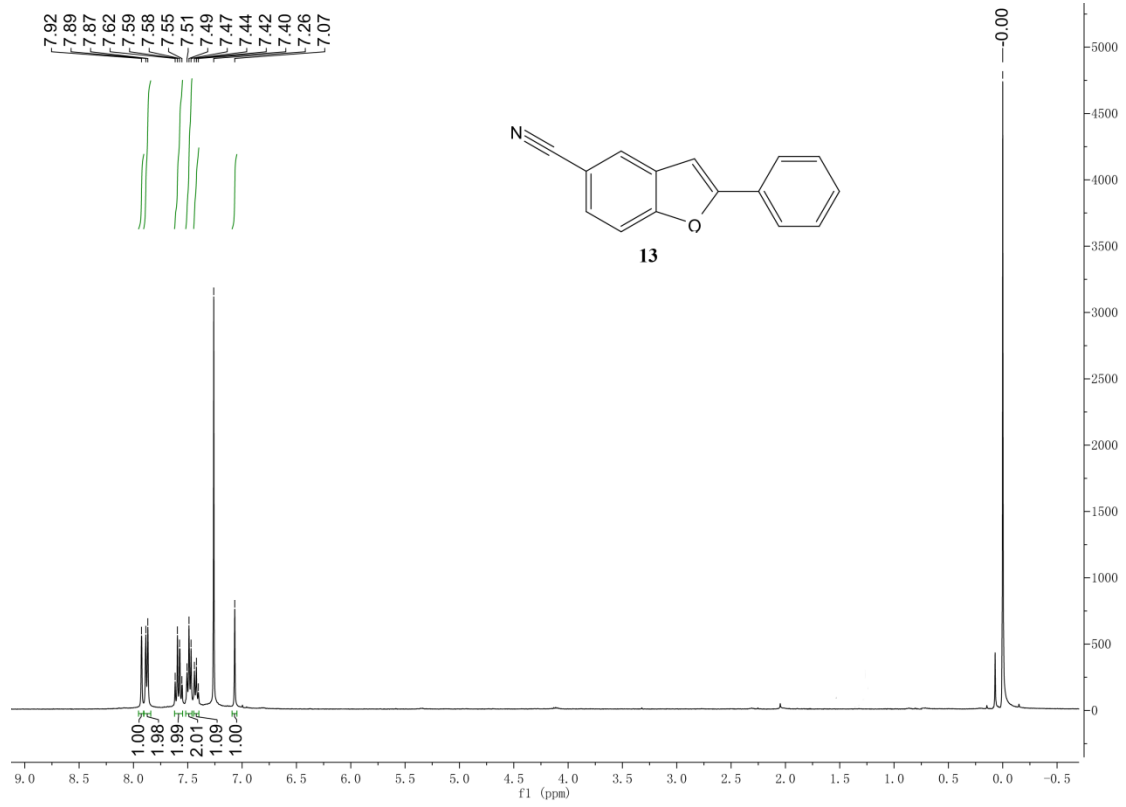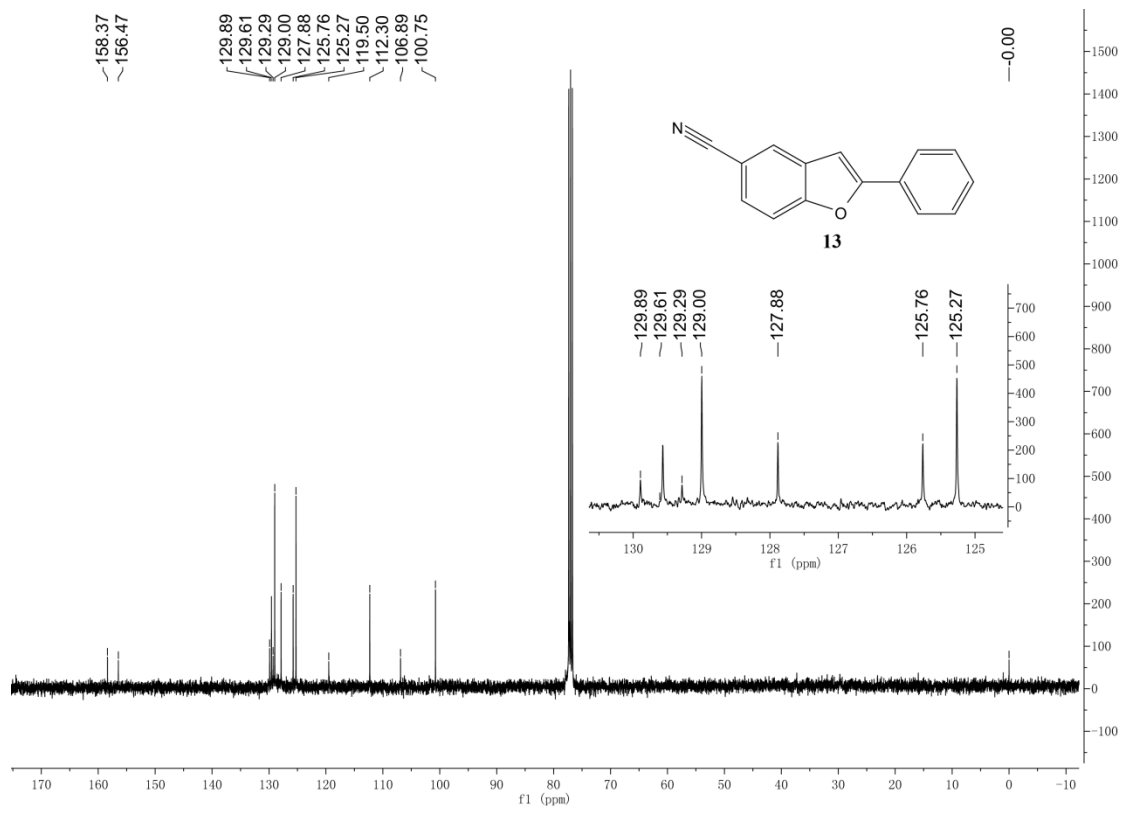

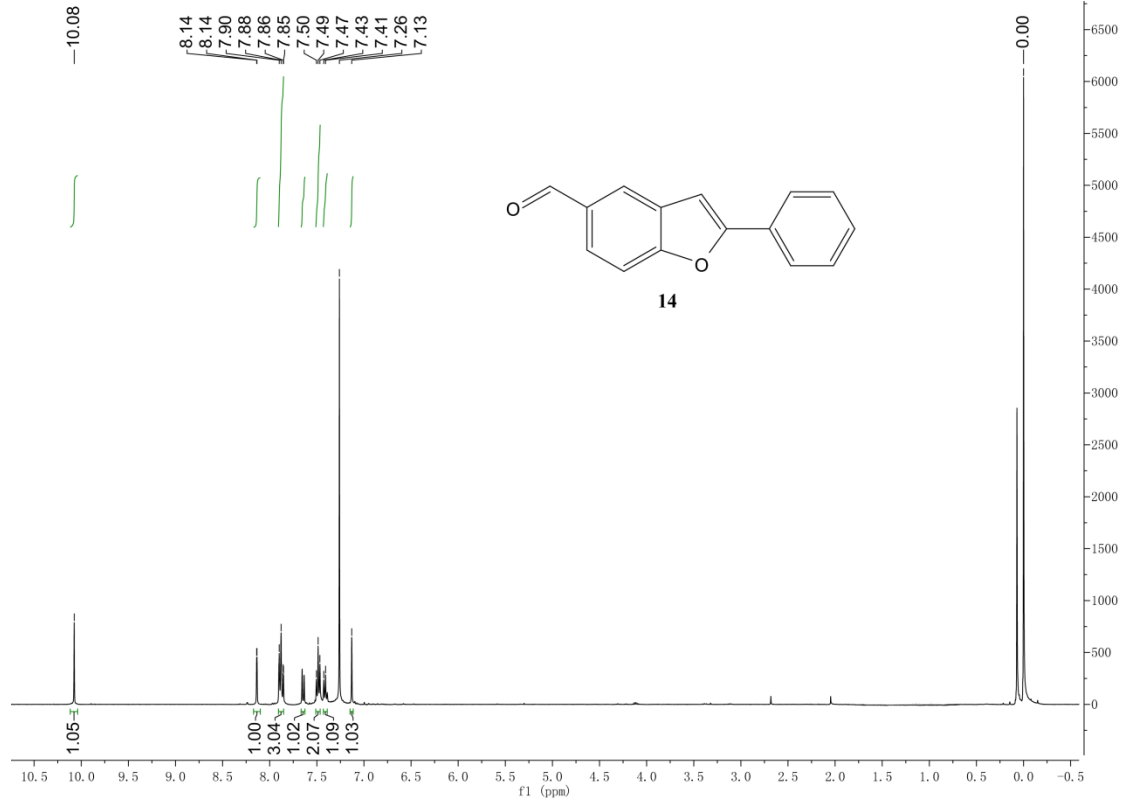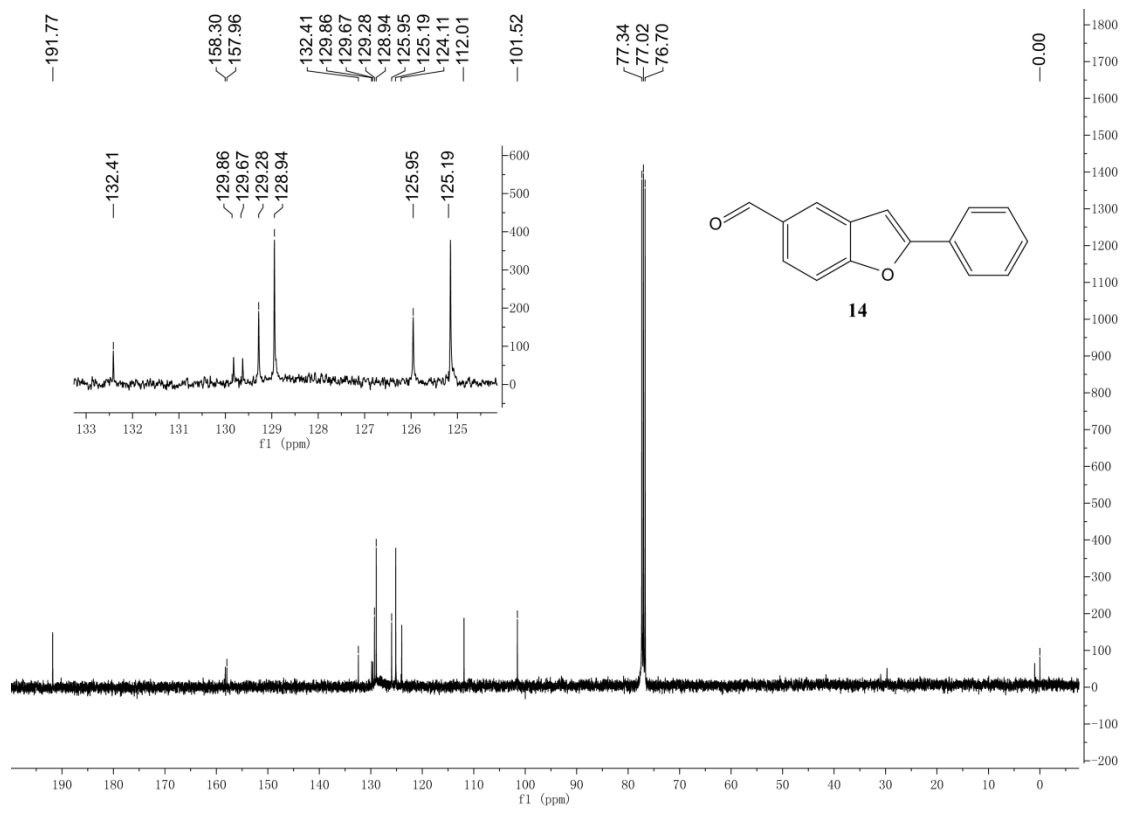

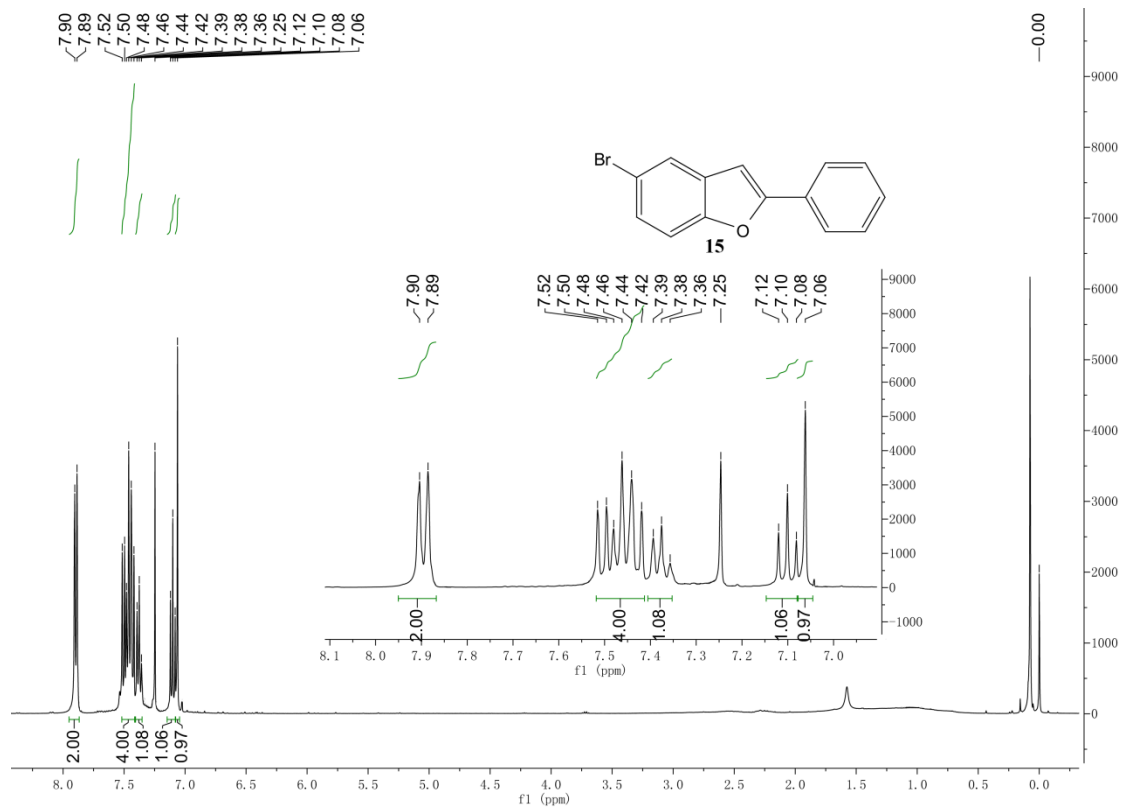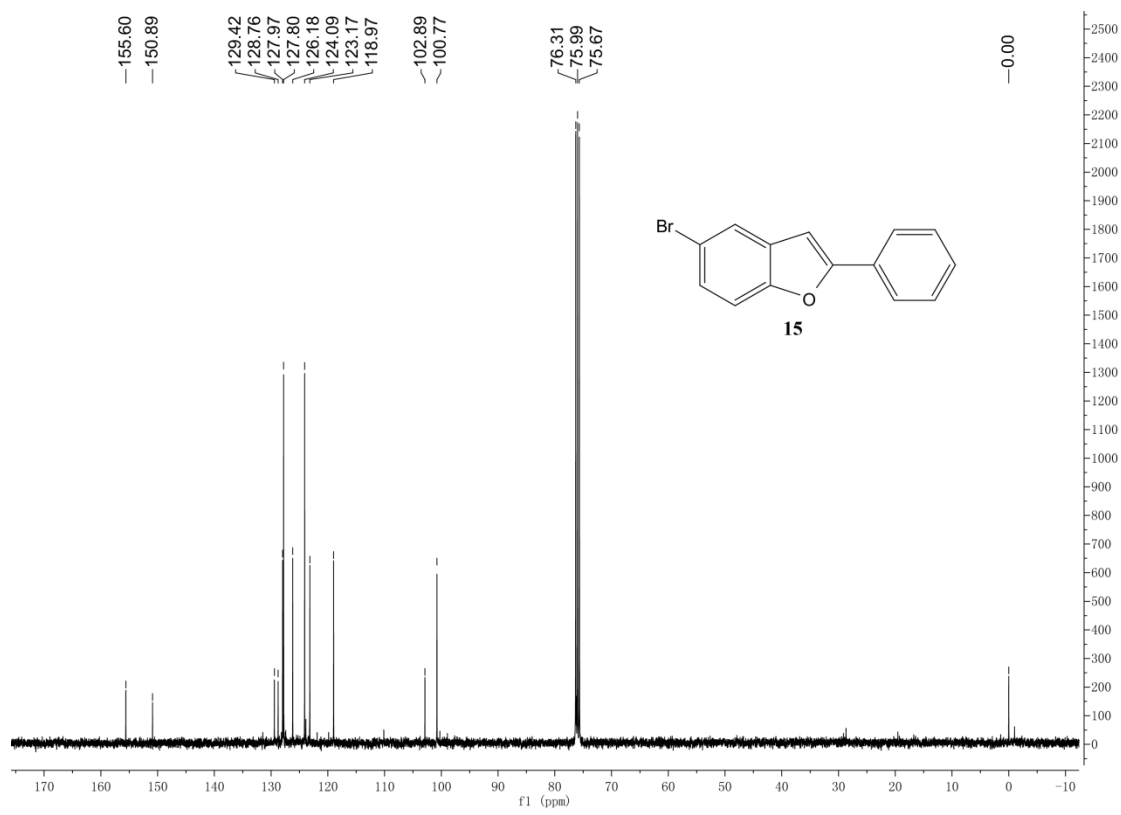

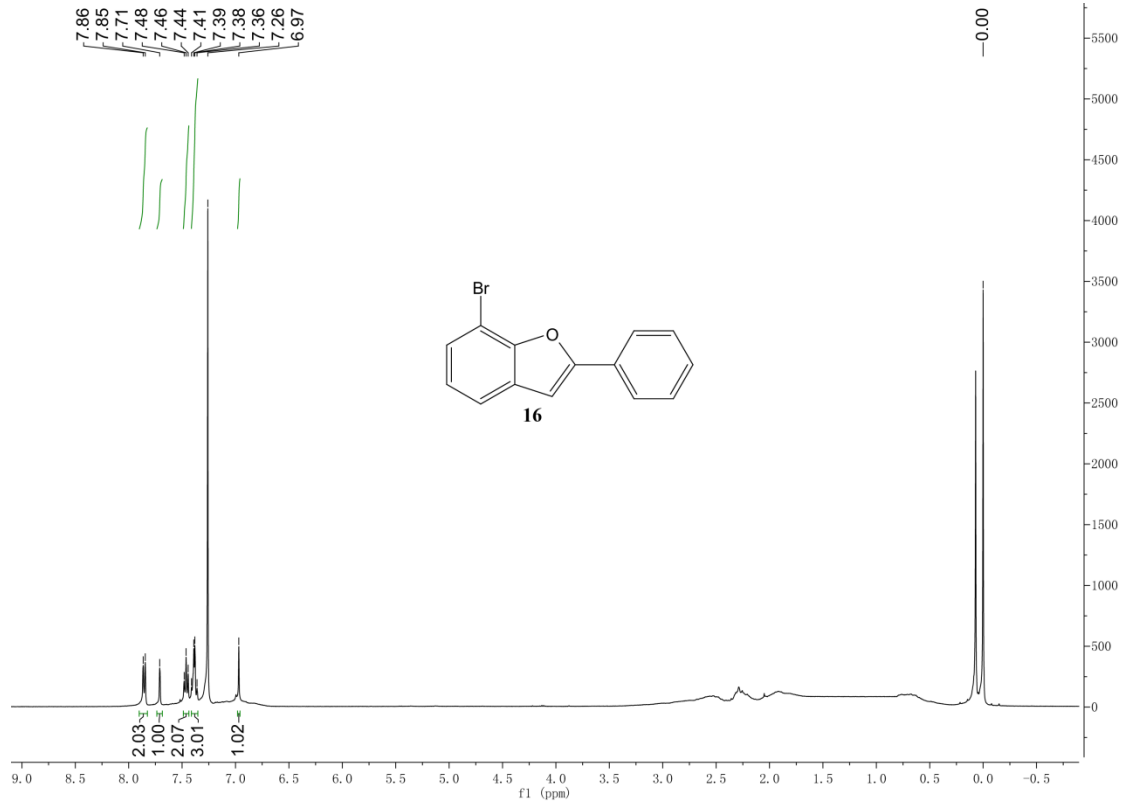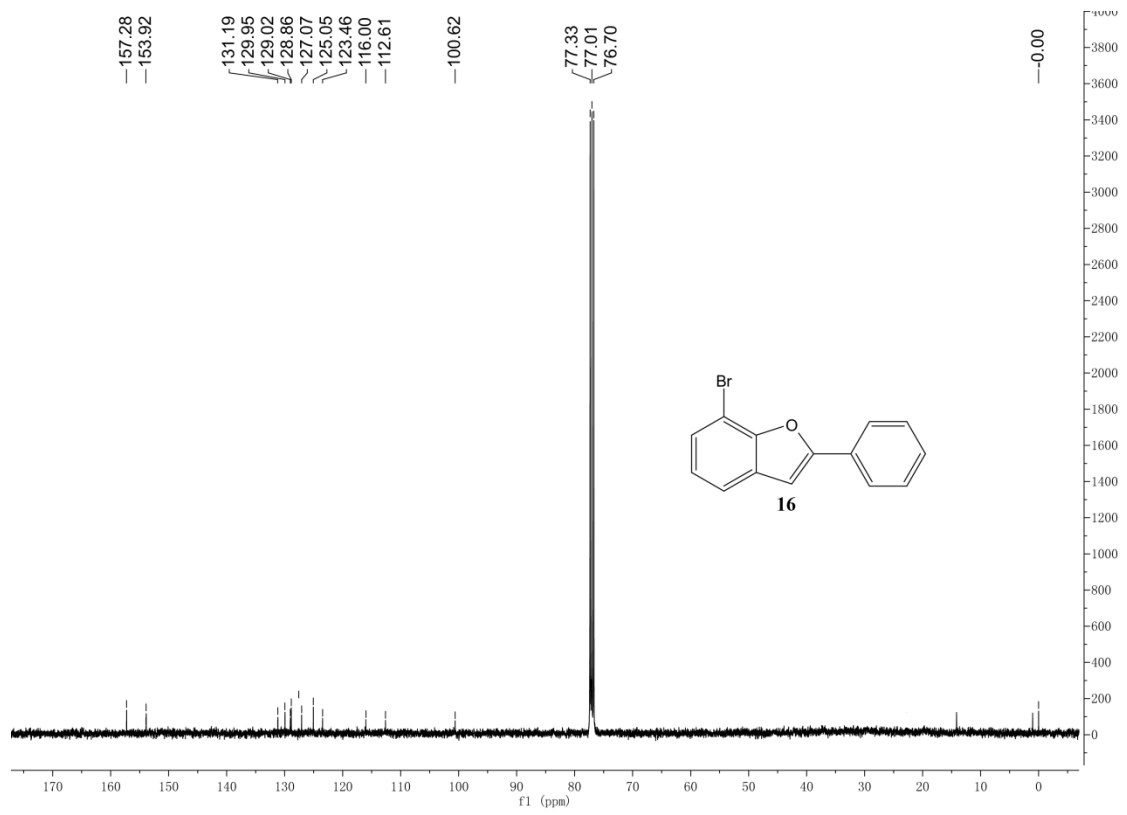



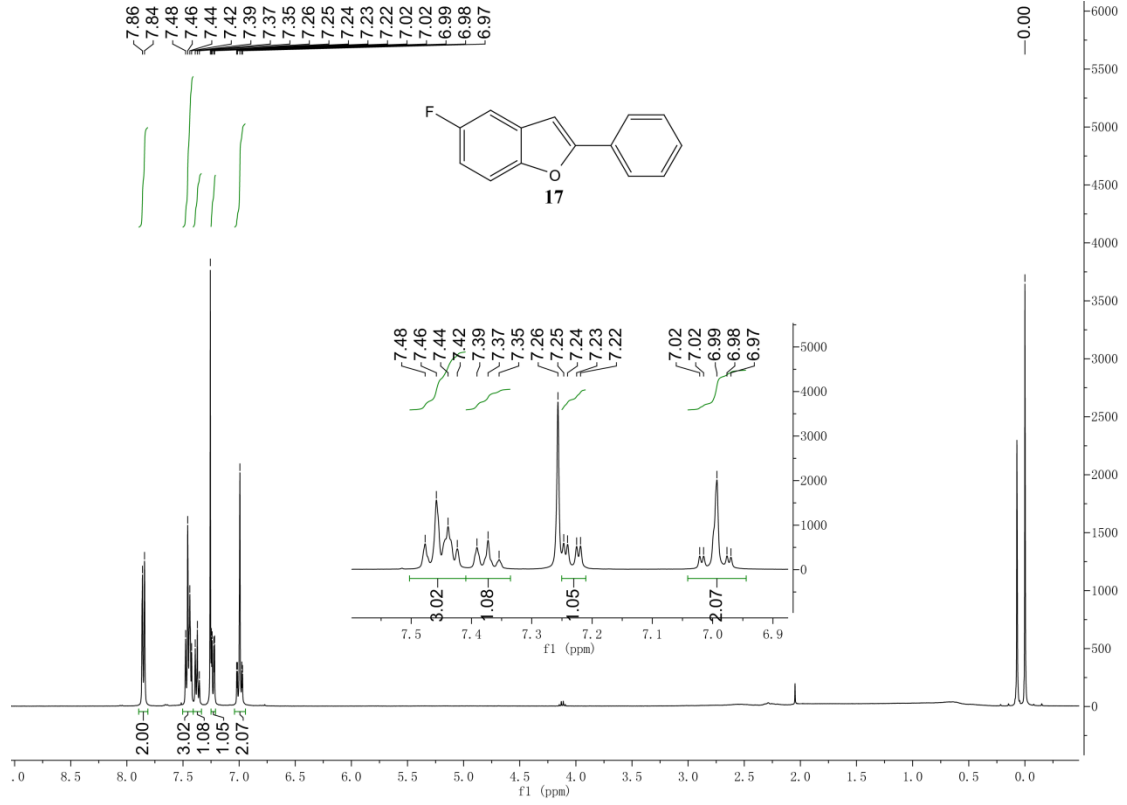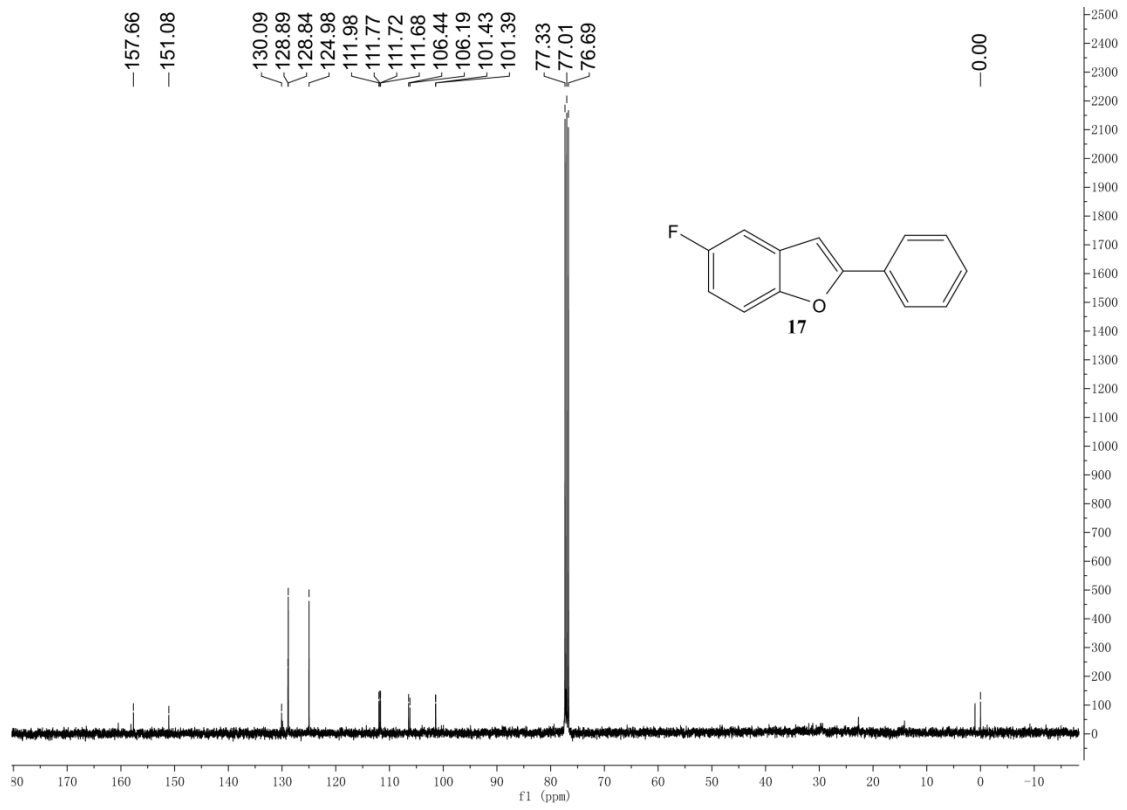

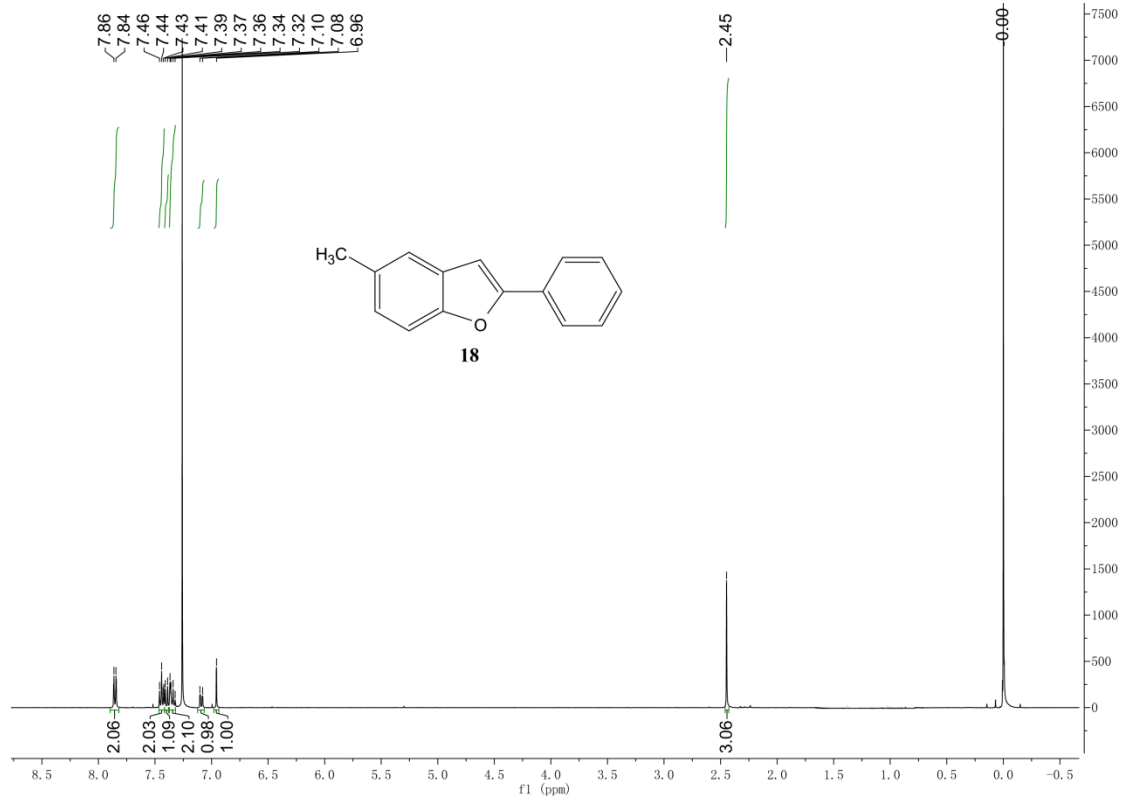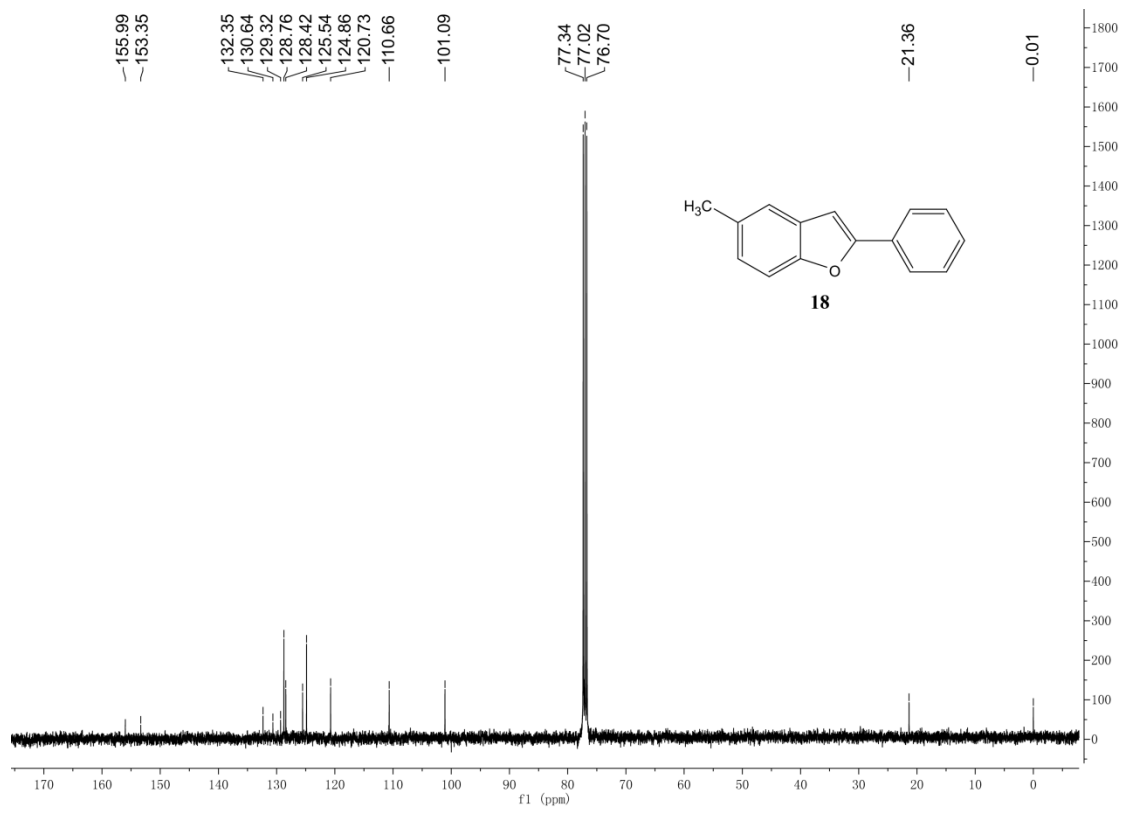

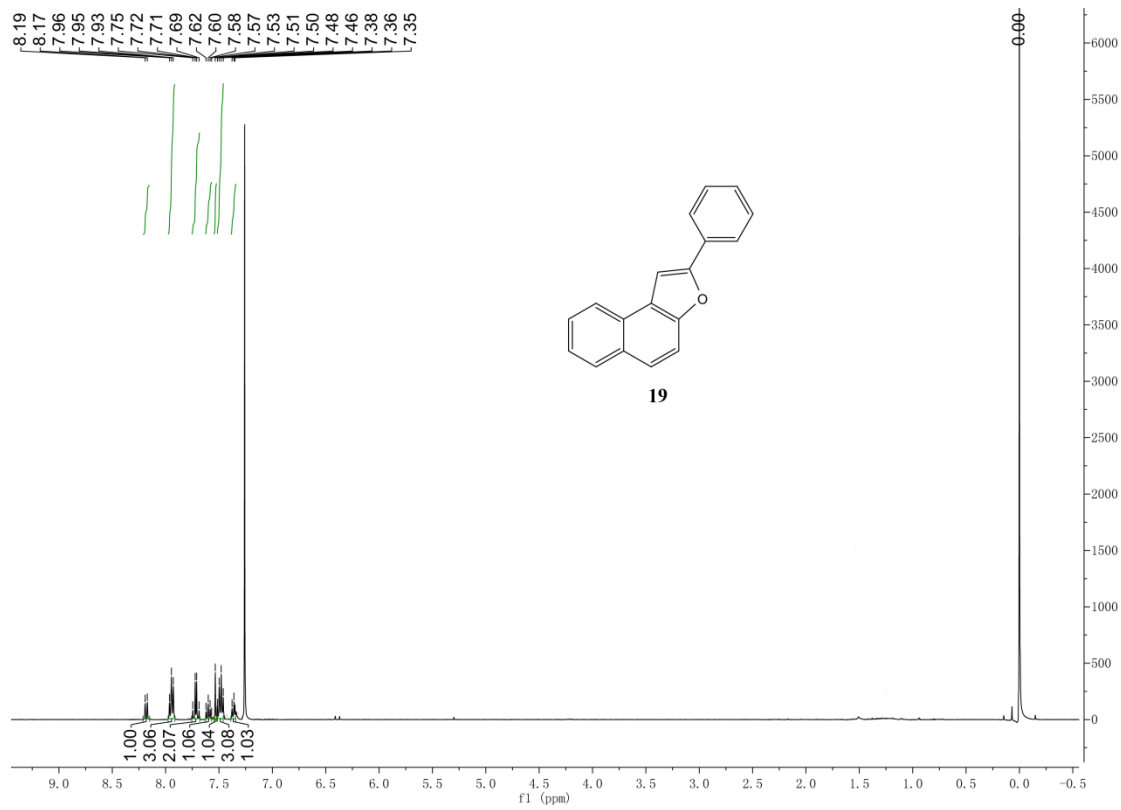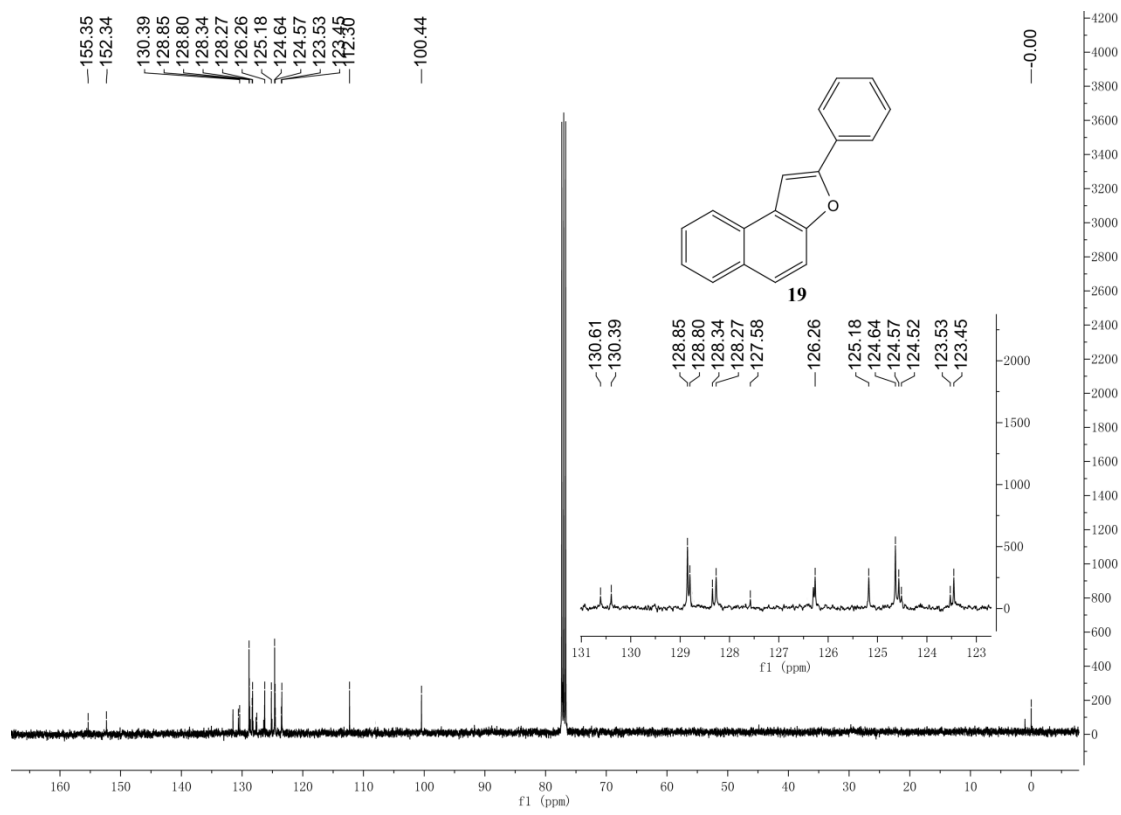

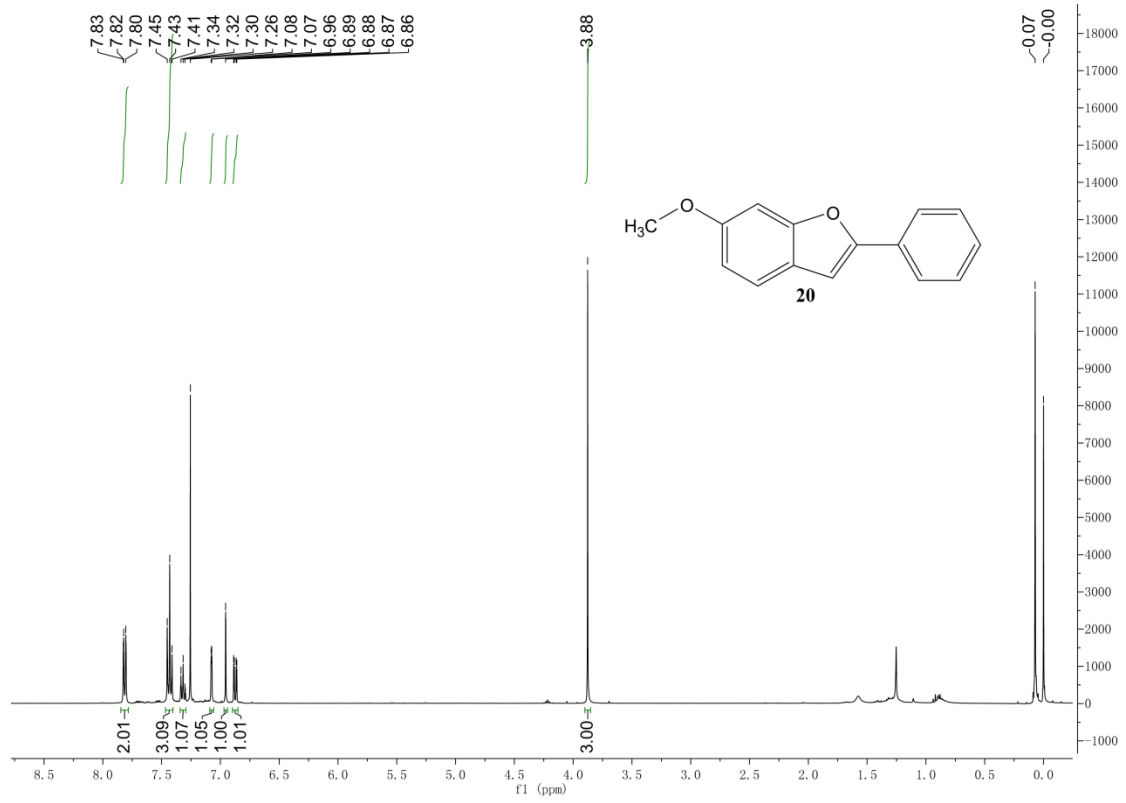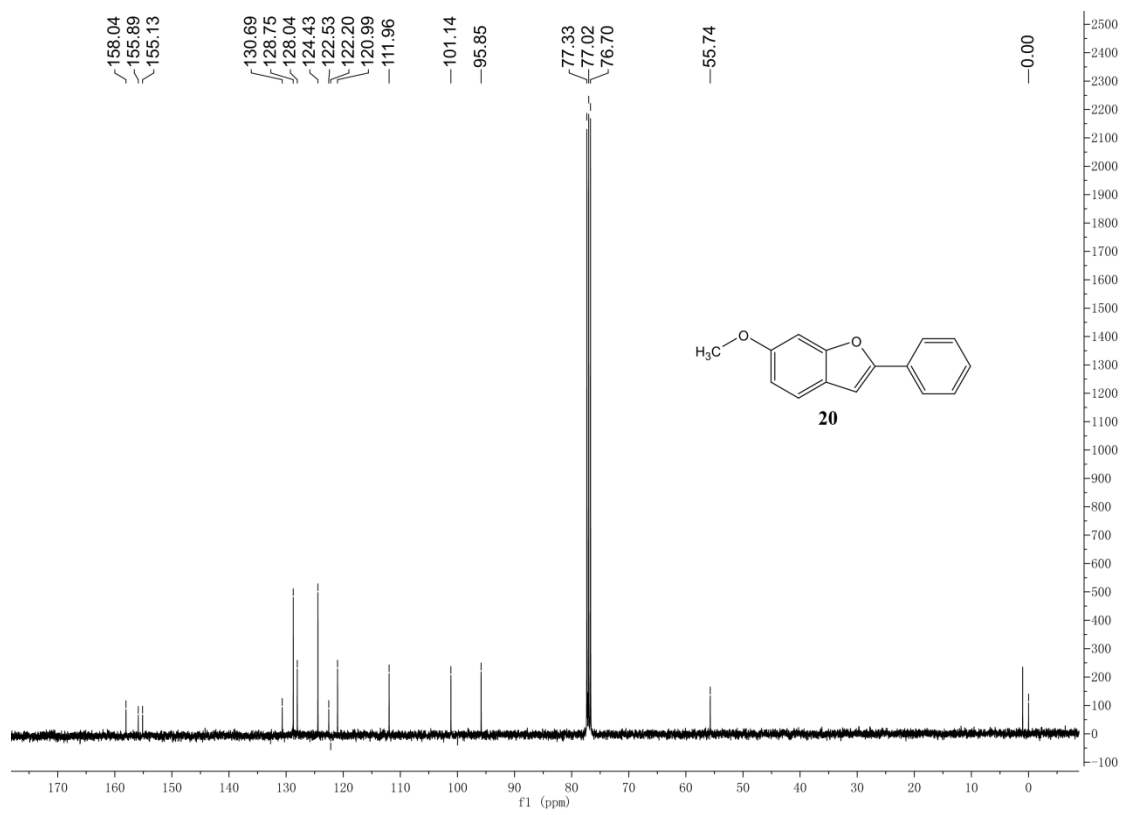

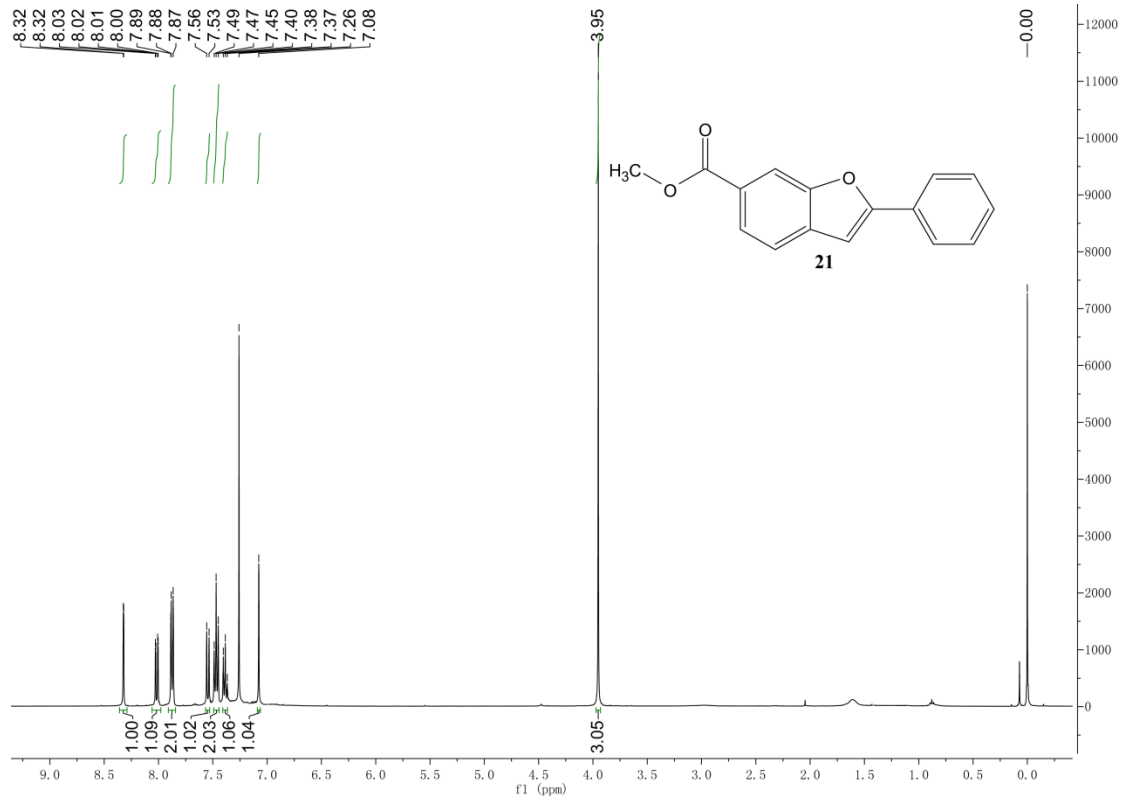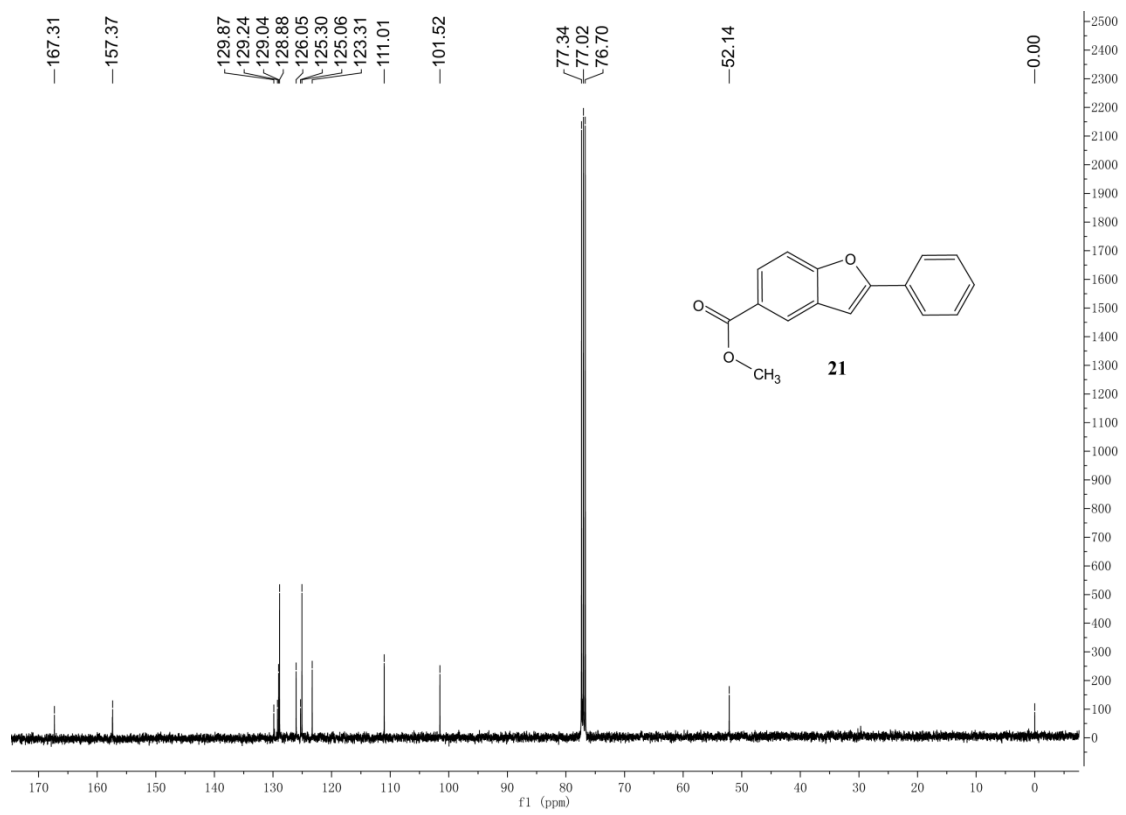

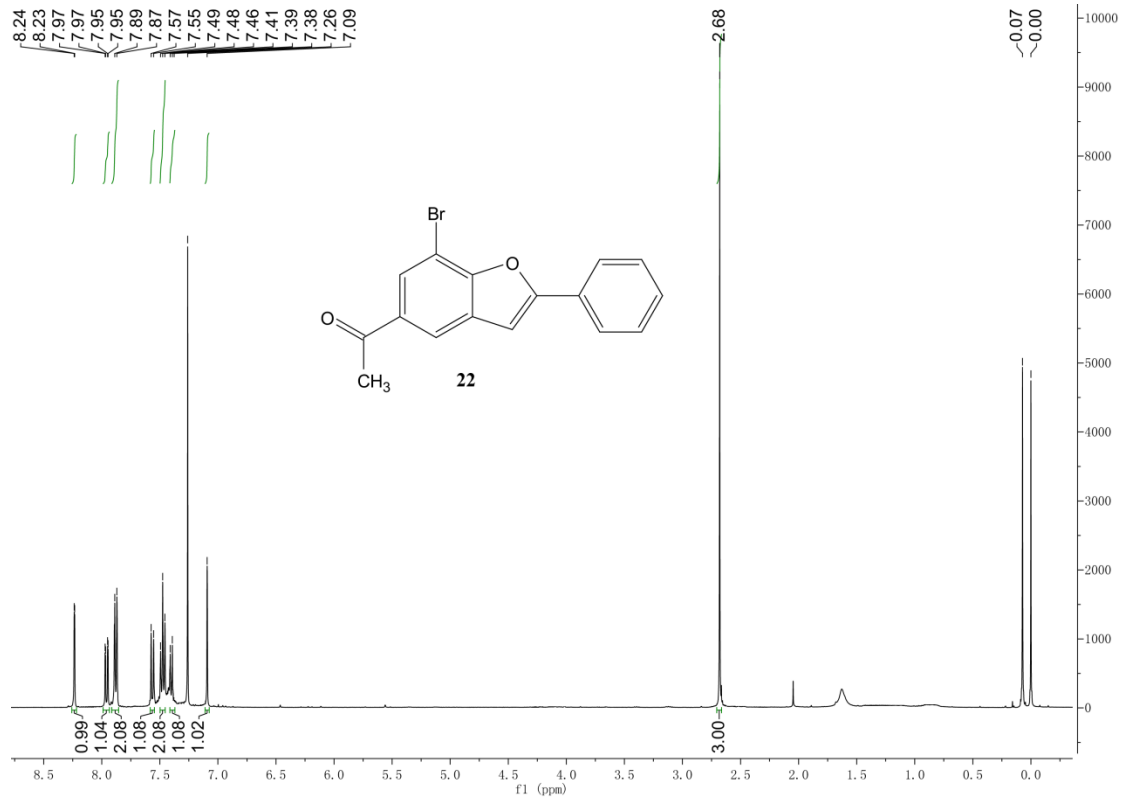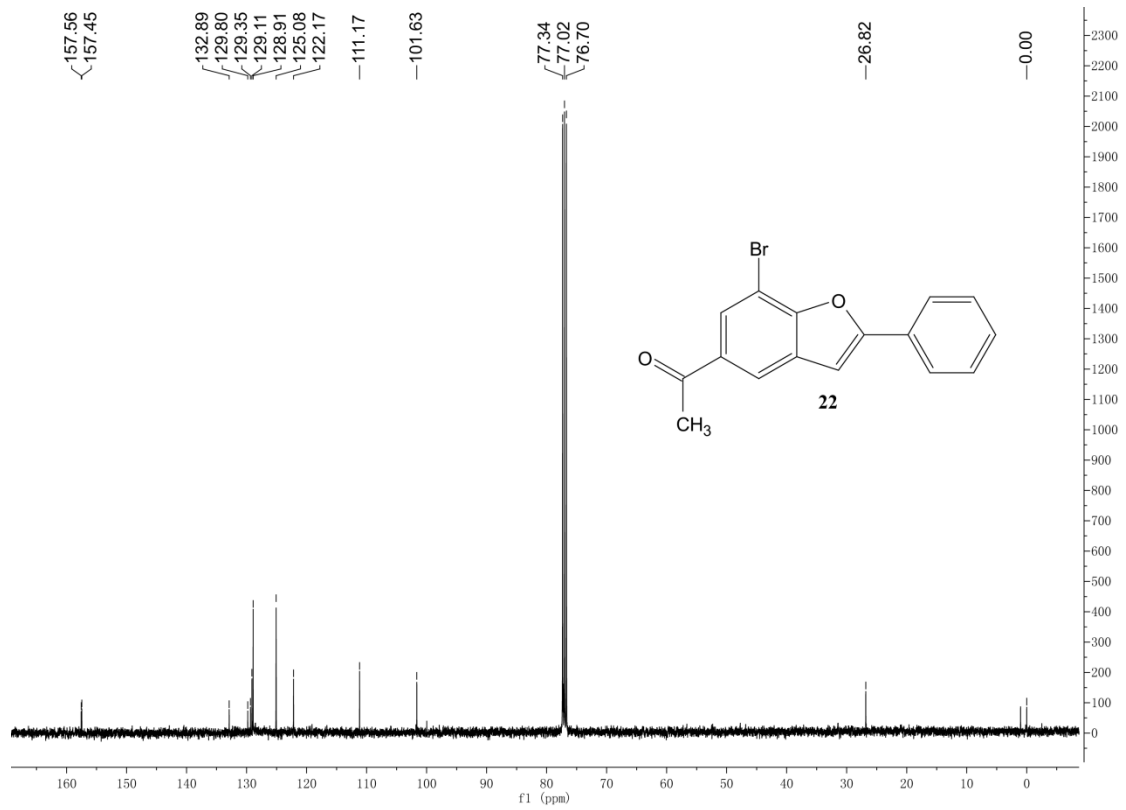

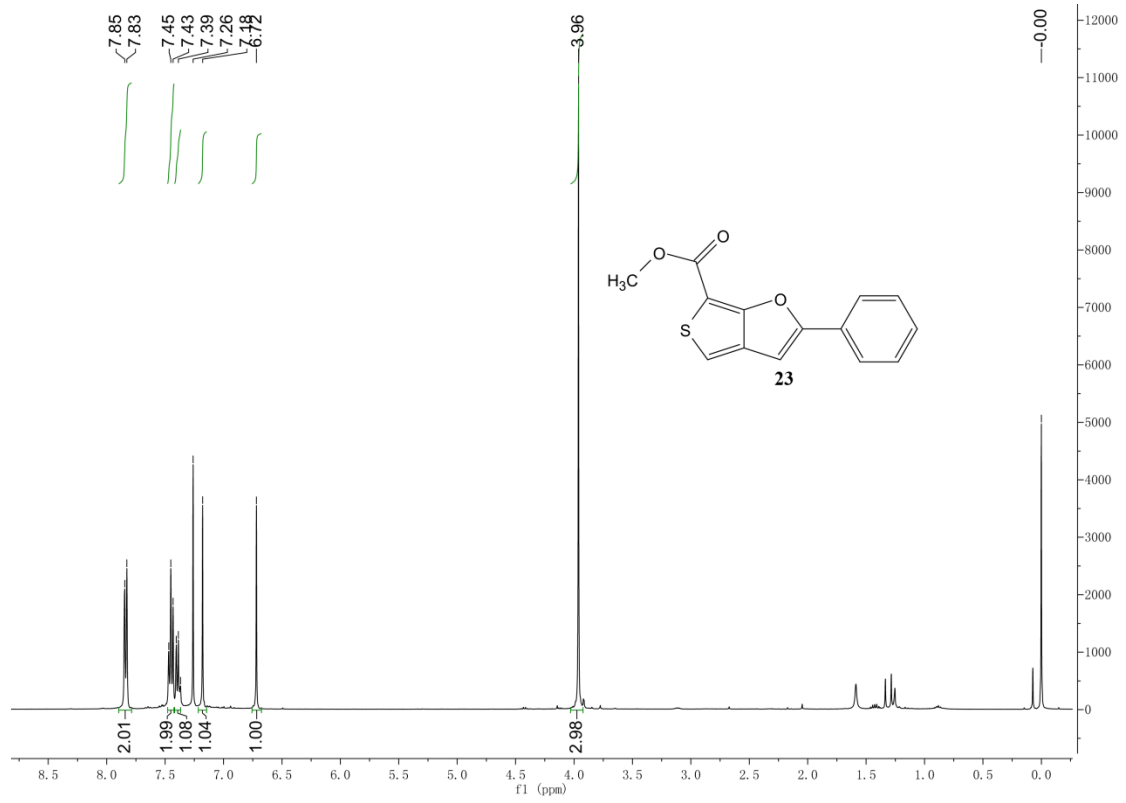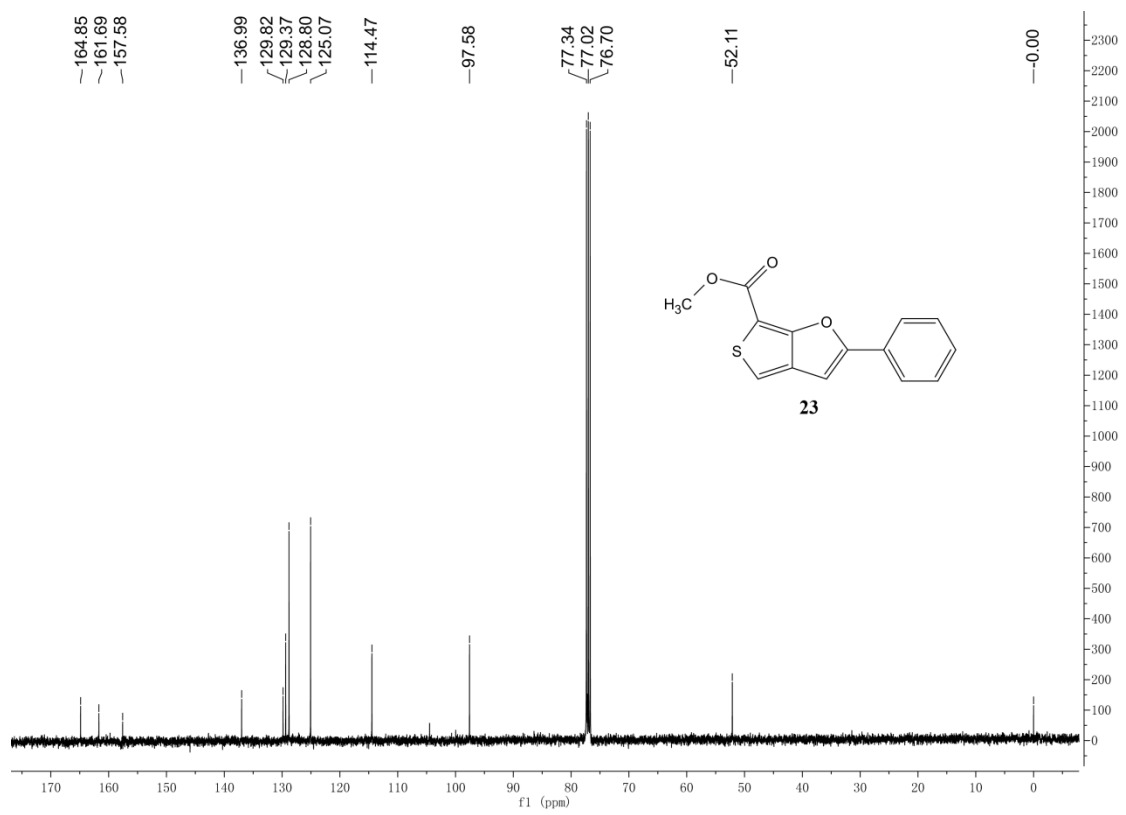

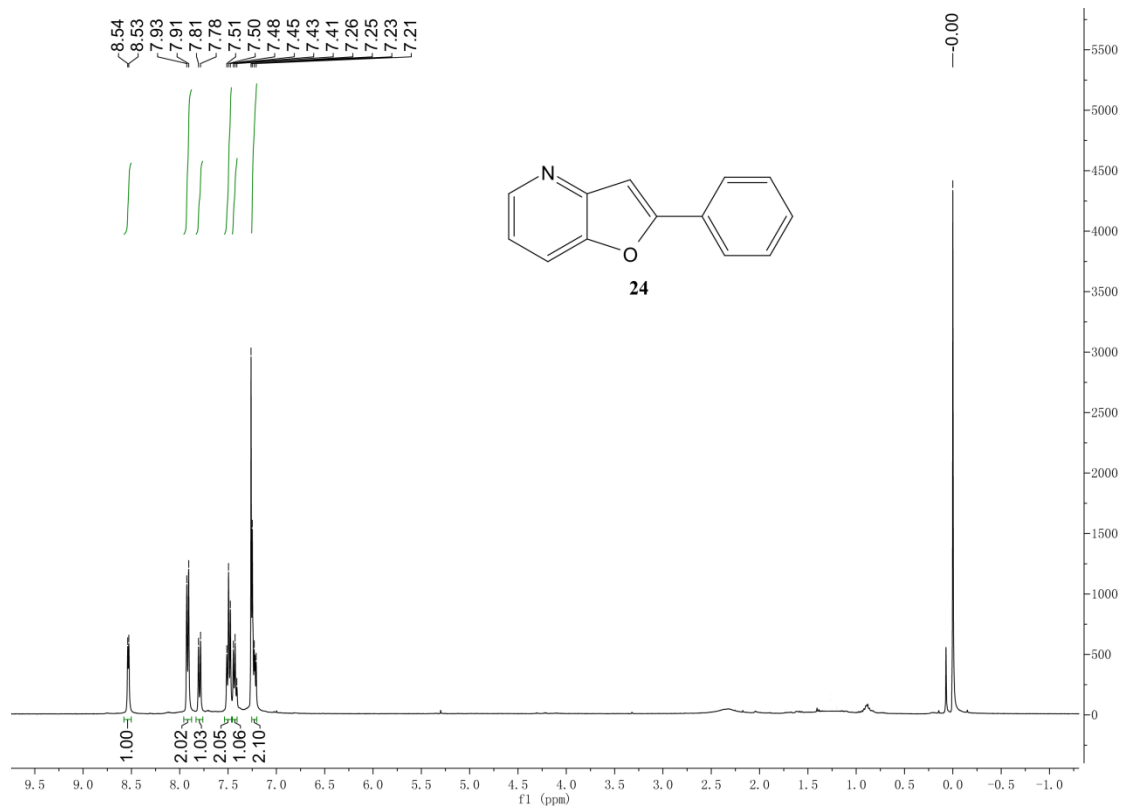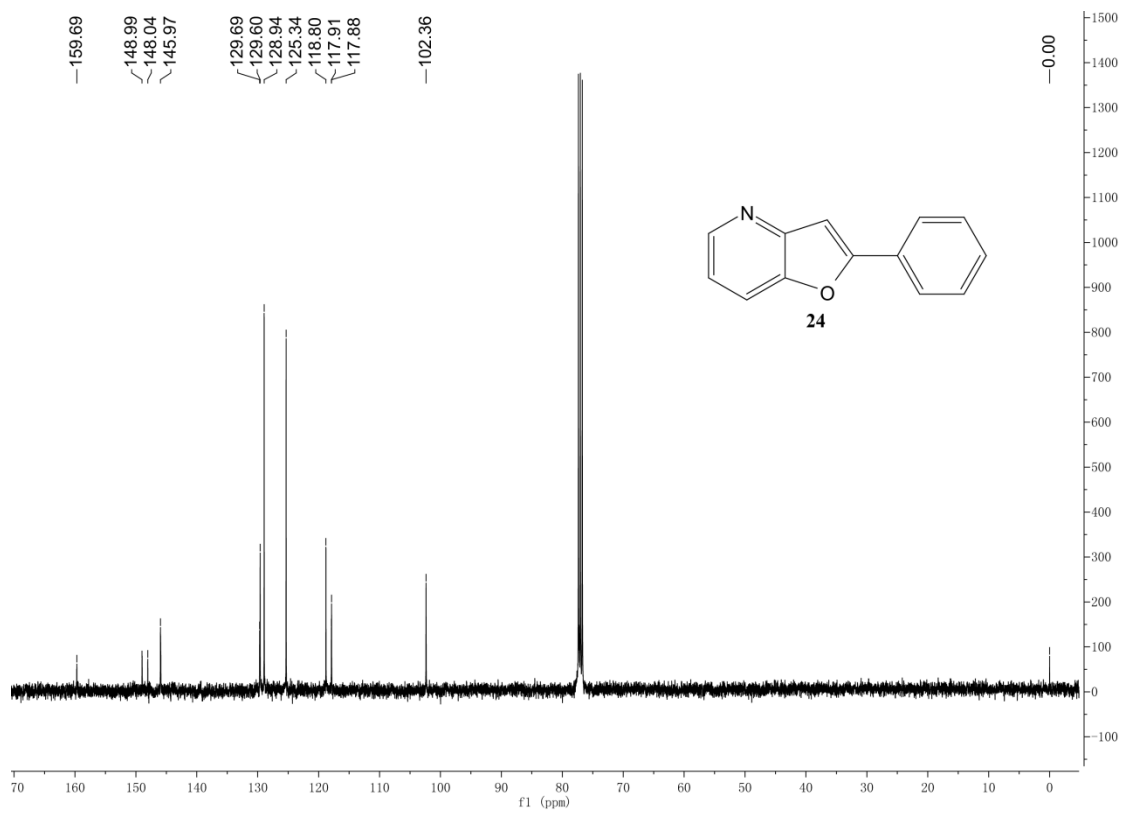



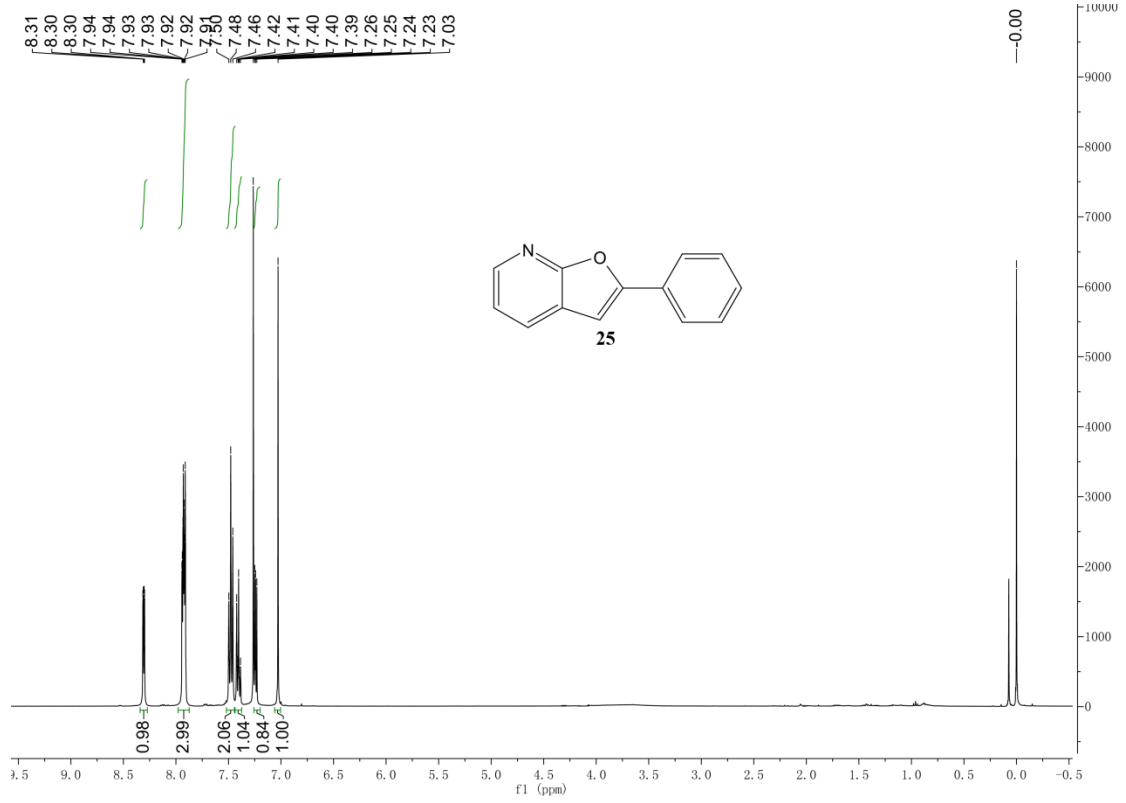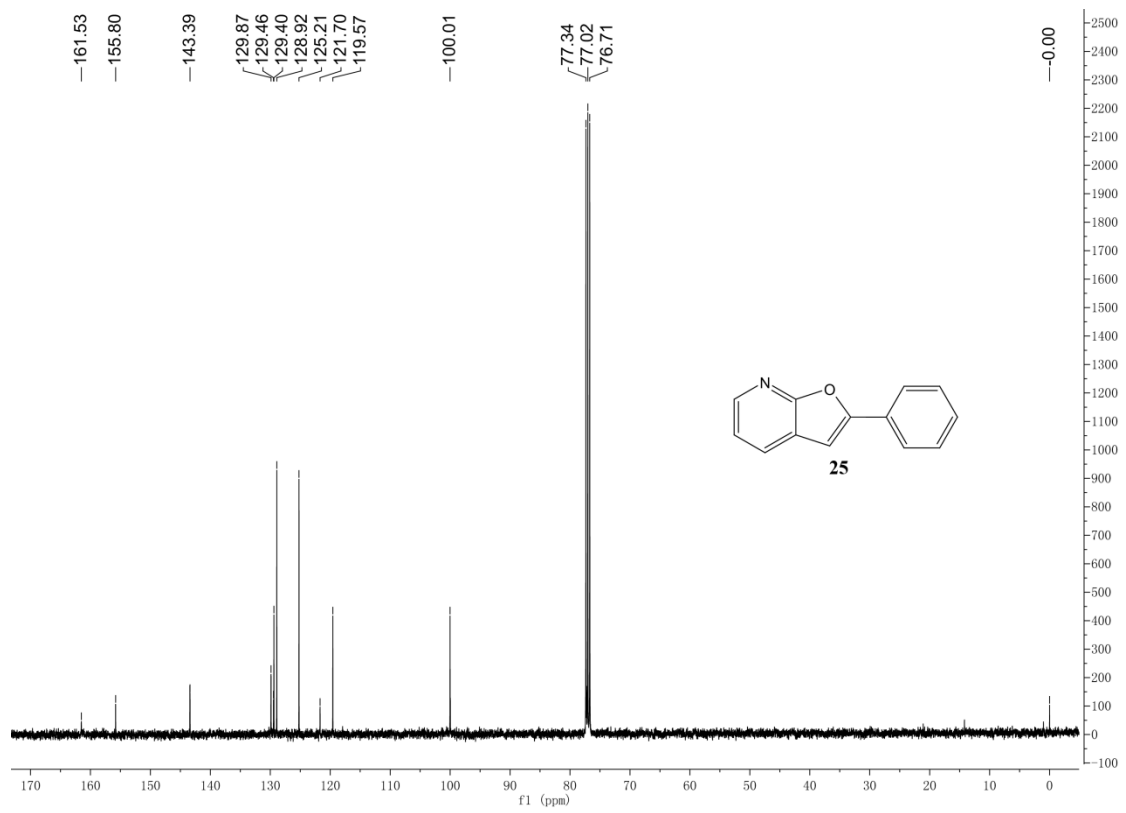

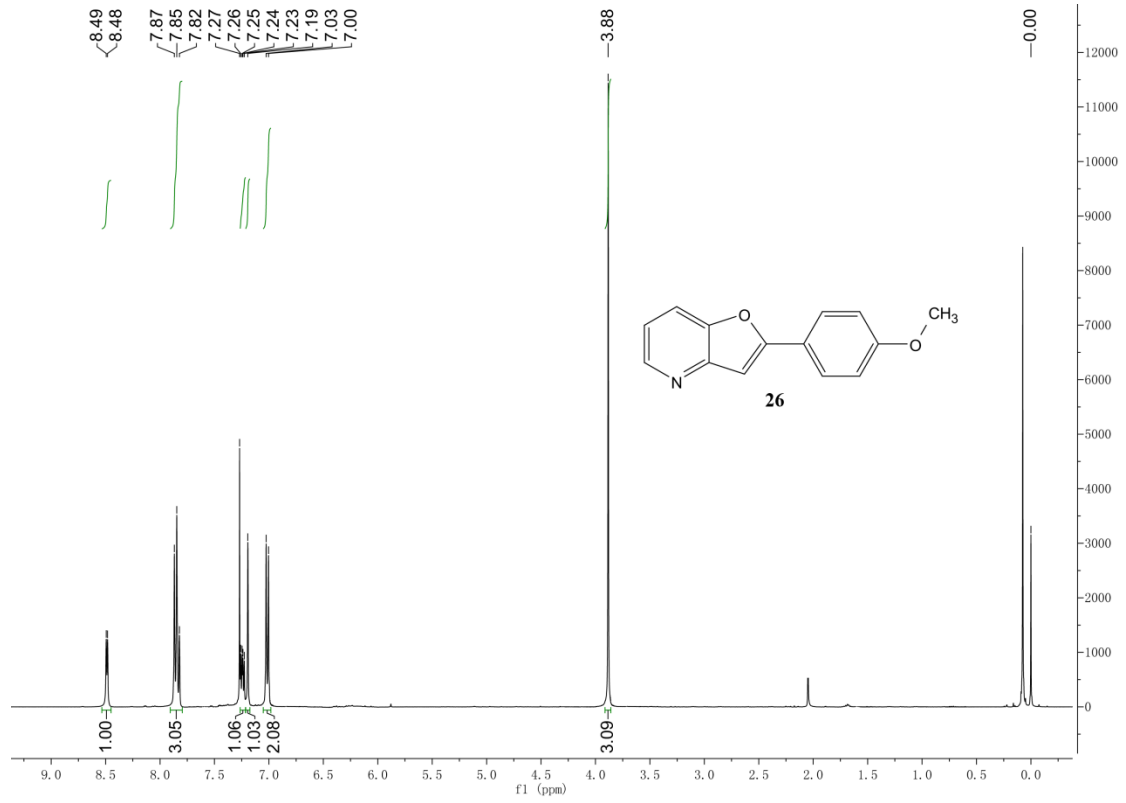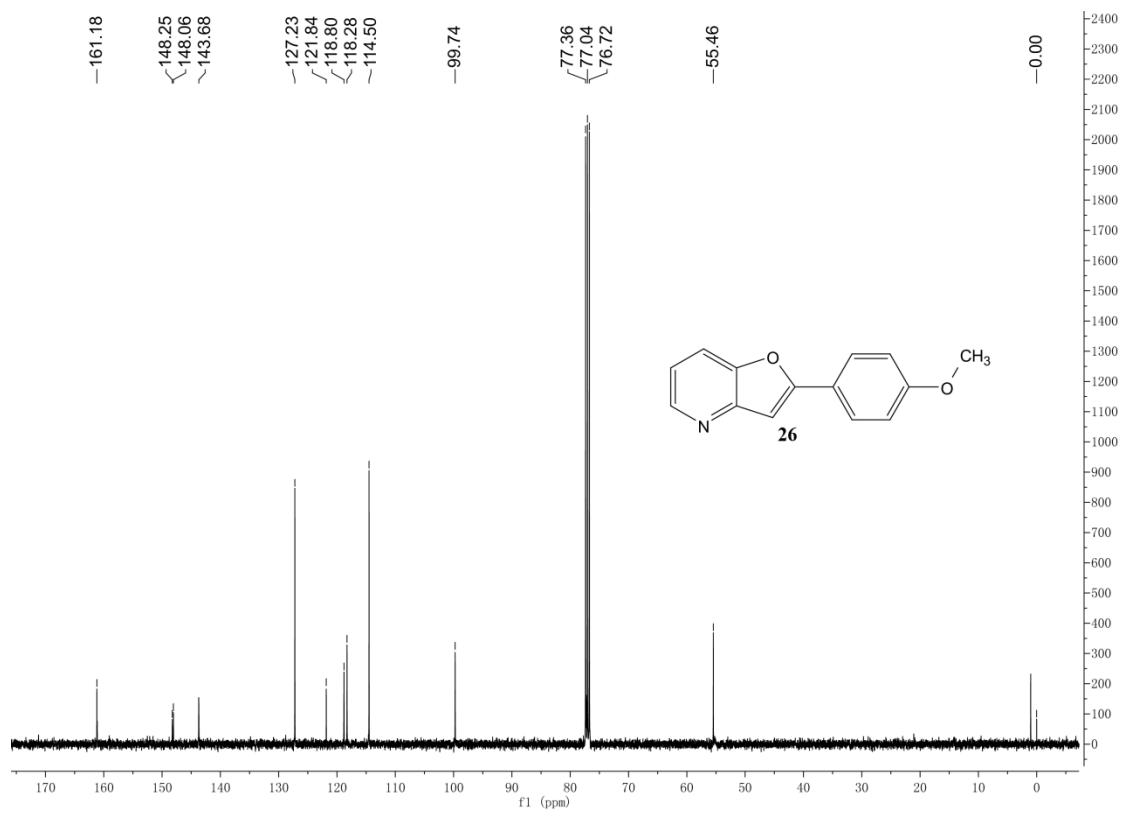

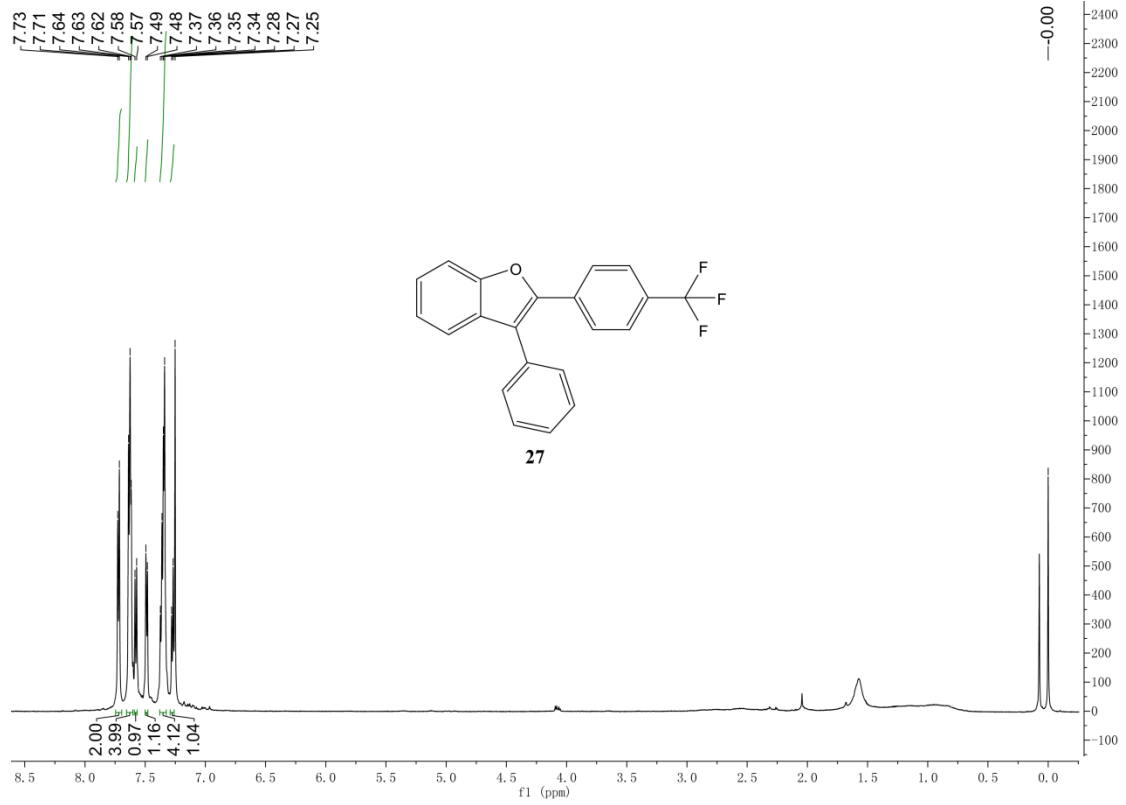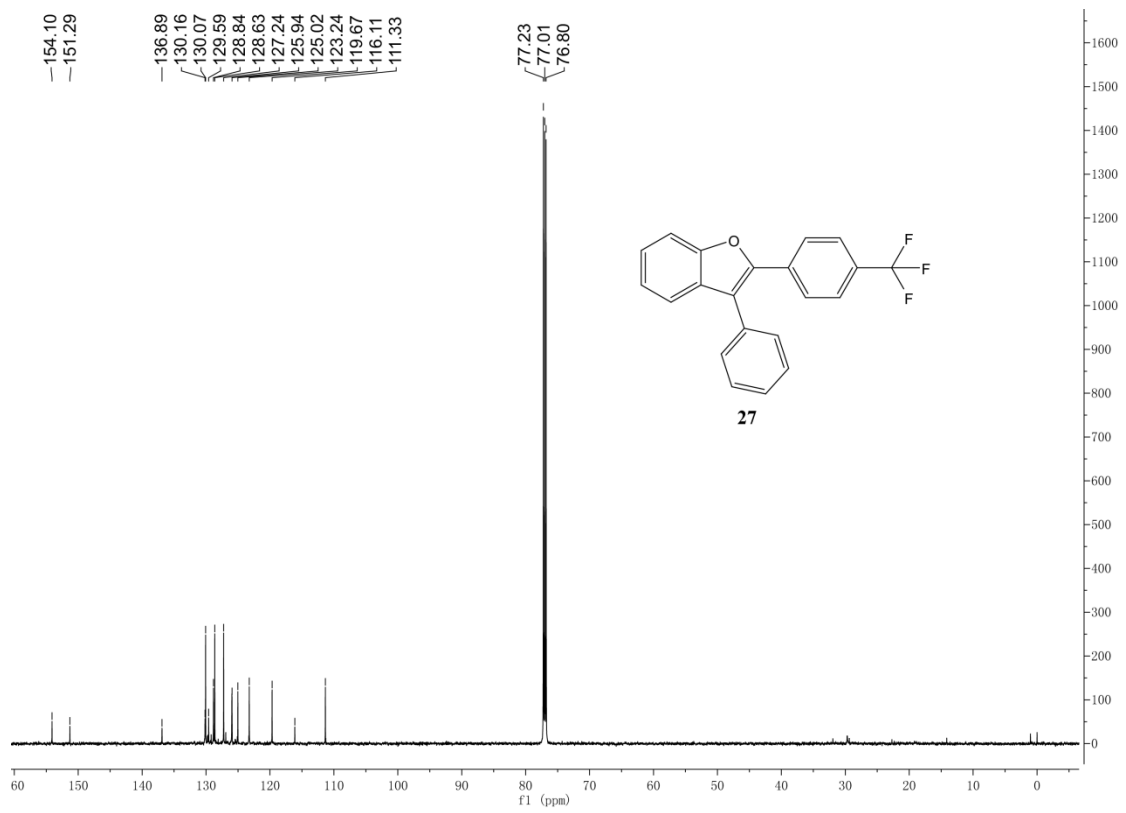

Supplement: c4cc00815d1.pdf [file c4cc00815d1.pdf]
